# Supplementary material for: Genetic variation in Tunisia in the context of human diversity worldwide
Source: PubMed Central journal article supplement — Am J Phys Anthropol. 2016 May 18;161(1):62–71. doi: 10.1002/ajpa.23008 (PMC5084816; doi:10.1002/ajpa.23008), 2016-05-18

**Supplementary Tables and Figures for manuscript:**

**Genetic variation in Tunisia in the context of human diversity worldwide**

**Authors:**

Lotfi Cherni<sup>1,2</sup>, Andrew J. Pakstis<sup>3</sup>, Sami Boussetta<sup>1</sup>, Sarra Elkamel<sup>1</sup>, Sabehe Frigi<sup>1</sup>, Houssein Khodjet-El-Khil<sup>1</sup>, Alison Barton<sup>3</sup>, Eva Haigh<sup>3</sup>, William C. Speed<sup>3</sup>, Amel Ben Ammar Elgaaied<sup>1</sup>, Judith R. Kidd<sup>3</sup>, Kenneth K. Kidd<sup>3</sup>

<sup>1</sup> Laboratory of Genetics, Immunology and Human Pathology, Science Faculty of Tunis, University of Tunis El Manar, 2092 Tunis, Tunisia

<sup>2</sup> High Institute of Biotechnology, University of Monastir, 5000 Monastir, Tunisia.

<sup>3</sup> Department of Genetics, Yale University School of Medicine, New Haven, CT 06520 USA

**submitted to**

**American Journal of Physical Anthropology**

## SUPPLEMENTARY TABLES AND FIGURES

**Table S1A.** The 65 populations studied by geographical region. Table shows the sample size for each group, population abbreviations employed in figures, and the rank ordering of populations in figures. The same relative order for these populations occurs in joint analyses of 73 populations.

**Table S1B.** The 8 populations from Henn et al. (2012) included in the combined analysis with the populations listed in Table S1A. Sample sizes and population abbreviations employed are shown. The order column shows the position of these 8 populations in figures reporting analyses based on the 73 populations.

**Table S2.** The dbSNP rs-numbers for the 399 SNPs studied are presented by chromosome and nucleotide position. They defined a total of 299 polymorphic markers in the 65 population analysis. The third column indicates the 159 SNPs that defined 59 multi-snp haplotypes; the other 240 SNPs were single site markers. The second column indicates the 102 SNPs that overlap with the dataset of Henn et al. (2012) and also had sufficiently complete genotypes so that they could be utilized in the combined analysis of 73 populations. A total of 90 polymorphic markers were included in the 73 population dataset; 21 of the 102 SNPs defined 9 multi-SNP haplotypes and the other 81 SNPs were single marker sites.

**Table S3.** List of 9 functional SNPs plus 9 nearby non-functional SNPs included in multi-SNP haplotypes

**Figure S1.** Allele frequency barplot on 65 populations for example haplotype

**Figure S2.** Comparing average heterozygosities of populations in 299 marker and 90 marker datasets

**Figure S3.** Principal Components Analysis plot for pc #1 and pc #3. PCA is based on pairwise Tau genetic distances for 65 populations.

**Figure S4.** Principal Components Analysis plot—73 populations, 90 markers study—pc #1 x pc #2

**Figure S5.** Principal Components Analysis plot—73 populations, 90 markers study —pc #1 x pc #3

**Figure S6.** STRUCTURE individual bar plots—73 population study, 90 markers study—displaying results for runs with highest likelihood out of 20 runs in each cluster K=5 to 11. Each individual has a separate column in the bar plot and the individuals in a population are clustered together in the display but the STRUCTURE analysis was not informed about an individual's population membership. Black vertical lines identify the population boundaries. The height extent of each color for an individual corresponds to the estimated membership of the individual in one of the clusters; each cluster is assigned a separate color. The bars with multiple colors can be interpreted as genetic admixture or as relative probabilities of belonging to the different clusters. Since there is a separate color bar for each of the more than 3000 individuals, the interval width covered by a population varies and corresponds to the number of individuals in the population.

**Figures S7 to S17.** Allele frequency bar plots of functional SNPs and some nearby non-functional SNPs included in multi-allelic haplotypes.

**Figure S7.** SNP allele frequency plot--EDAR chr. 2 rs3827760

**Figure S8.** Haplotype allele frequency plot—EDAR chr. 2 rs3827760 (fn), rs2169812, rs2378217, rs940928

**Figure S9.** SNP allele frequency plot—ADH1B chr. 4 rs1229984

**Figure S10.** Haplotype allele frequency plot—TAS2R1 chr. 5 rs41461, rs2234233 (fn)

**Figure S11.** SNP allele frequency plot—TAS2R1 chr. 5 rs2234233 (fn)

**Figure S12.** SNP allele frequency plot—SLC45A2 chr. 5 rs16891982 (fn)

**Figure S13.** Haplotype allele frequency plot—SLC45A2 chr. 5 rs11955798, rs7737265, rs16891982 (fn), rs28777

**Figure S14.** Haplotype allele frequency plot—SLC45A2 chr. 5 rs26722 (fn), rs35408

**Figure S15.** Haplotype allele frequency plot—TAS2R38 chr. 7 rs1726866 (fn), rs713598 (fn)

**Figure S16.** SNP allele frequency plot—HERC2 chr. 15 rs12913832

**Figure S17.** Haplotype allele frequency plot—MC1R chr. 16 rs3212363, rs885479 (fn)

**Figures S18 to S23.** Principal Components Analysis (PCA) plots focused on N.Afr and SW Asia.

**Figure S18.** PCA #1x#2 for 7 Tunisian, 1 Libyan populations, 299 polymorphisms

**Figure S19.** PCA #1x#3 for 7 Tunisian, 1 Libyan populations, 299 polymorphisms

**Figure S20.** PCA #2x#3 for 7 Tunisian, 1 Libyan populations, 299 polymorphisms

**Figure S21.** PCA #1x#2 for 8 N Afr (Tunisian, Libyan) populations & 4 SWAsian populations, 299 polymorphisms

**Figure S22.** PCA #1x#2 for 15 North African populations, 90 polymorphisms

**Figure S23.** PCA #1x#2 for 15 North African populations and 4 SW Asian populations, 90 polymorphisms

**Table S1A. 65 Populations studied; order employed in tables and figures**

| <b>Geographical Region</b> | <b>Order</b> | <b>Population Sample</b> | <b>Population Abbreviation</b> | <b>Number of Individuals</b> |
|----------------------------|--------------|--------------------------|--------------------------------|------------------------------|
| <b>Africa, SubSahara</b>   | 1            | Biaka                    | BIA                            | 66                           |
|                            | 2            | Mbuti                    | MBU                            | 38                           |
|                            | 3            | Lisongo, Cen.Afr.Rep.    | LIS                            | 7                            |
|                            | 4            | Yoruba, Nigeria          | YOR                            | 77                           |
|                            | 5            | Ibo, Nigeria             | IBO                            | 47                           |
|                            | 6            | Hausa, Nigeria           | HSA                            | 38                           |
|                            | 7            | Chagga, Tanzania         | CGA                            | 45                           |
|                            | 8            | Masai, Tanzania          | MAS                            | 20                           |
|                            | 9            | Sandawe, Tanzania        | SND                            | 40                           |
|                            | 10           | Zaramo, Tanzania         | ZRM                            | 37                           |
|                            | 11           | African Americans        | AAM                            | 89                           |
|                            | 12           | Ethiopian Jews           | ETJ                            | 31                           |
| <b>Africa, North</b>       | 13           | Nebeur, NW Tunisia       | NEB                            | 10                           |
|                            | 14           | Kesra, NW Tunisia        | KSR                            | 43                           |
|                            | 15           | Kairoun, Central Tunisia | KRN                            | 41                           |
|                            | 16           | Sousse, Central Tunisia  | SOU                            | 43                           |
|                            | 17           | Mehdia, Central Tunisia  | MHD                            | 33                           |
|                            | 18           | Kerkennah, S. Tunisia    | KRK                            | 40                           |
|                            | 19           | Smar, S.Tunisia          | SMR                            | 57                           |
|                            | 20           | Libyans-from 6 cities    | LYB                            | 64                           |
| <b>Asia, South West</b>    | 21           | Yemenite Jews            | YMJ                            | 41                           |
|                            | 22           | Kuwaiti                  | KWT                            | 15                           |
|                            | 23           | Druze                    | DRU                            | 101                          |
|                            | 24           | Samaritans               | SAM                            | 38                           |
|                            | 25           | Ashkenazi                | ASH                            | 79                           |
| <b>Europe</b>              | 26           | Sardinians               | SRD                            | 34                           |
|                            | 27           | Roman Jews               | RMJ                            | 26                           |
|                            | 28           | Adygei                   | ADY                            | 54                           |
|                            | 29           | Chuvash                  | CHV                            | 41                           |
|                            | 30           | Hungarians               | HGR                            | 89                           |
|                            | 31           | Russians, Archangelsk    | RUA                            | 33                           |
|                            | 32           | Russians, Vologda        | RUV                            | 47                           |
|                            | 33           | European Americans       | EAM                            | 88                           |
|                            | 34           | Irish                    | IRI                            | 111                          |
|                            | 35           | Danes                    | DAN                            | 51                           |
|                            | 36           | Finns                    | FIN                            | 34                           |
| <b>Siberia, North West</b> | 37           | Komi Zyrian              | KMZ                            | 46                           |
| <b>Asia, South Central</b> | 38           | Keralites                | KER                            | 30                           |

|                            |    |                          |     |  |              |
|----------------------------|----|--------------------------|-----|--|--------------|
|                            | 39 | Thoti                    | THT |  | 13           |
|                            | 40 | Kachari                  | KCH |  | 17           |
|                            |    |                          |     |  |              |
| <b>Siberia, North West</b> | 41 | Khanty                   | KTY |  | 49           |
| <b>Siberia, North East</b> | 42 | Yakut                    | YAK |  | 51           |
|                            |    |                          |     |  |              |
| <b>Asia, East</b>          | 43 | Koreans                  | KOR |  | 54           |
|                            | 44 | Japanese                 | JPN |  | 44           |
|                            | 45 | Chinese, San Francisco   | CHS |  | 56           |
|                            | 46 | Chinese, Taiwan          | CHT |  | 48           |
|                            | 47 | Hakka, Taiwan            | HKA |  | 41           |
|                            | 48 | Laotians                 | LAO |  | 118          |
|                            | 49 | Cambodians               | CBD |  | 23           |
|                            | 50 | Ami, Taiwan              | AMI |  | 40           |
|                            | 51 | Atayal, Taiwan           | ATL |  | 41           |
|                            | 52 | Malaysians               | MLY |  | 10           |
|                            |    |                          |     |  |              |
| <b>Pacific Islands</b>     | 53 | Samoans                  | SMO |  | 9            |
|                            | 54 | Micronesians             | MCR |  | 34           |
|                            | 55 | Papuans, New Guinea      | PNG |  | 22           |
|                            | 56 | Nasioi                   | NAS |  | 23           |
|                            |    |                          |     |  |              |
| <b>America, North</b>      | 57 | Plains Amerindians       | NPA |  | 55           |
|                            | 58 | Southwest Amerindians    | SWA |  | 50           |
|                            | 59 | Pima, Mexico             | PMM |  | 53           |
|                            | 60 | Maya, Yucatan            | MAY |  | 48           |
| <b>America, South</b>      | 61 | Guihiba, Colombia        | GHB |  | 11           |
|                            | 62 | Quechua, Peru            | QUE |  | 22           |
|                            | 63 | Ticuna, Amazon           | TIC |  | 65           |
|                            | 64 | Rondonian Surui, Amazon  | SUR |  | 43           |
|                            | 65 | Karitiana, Amazon        | KAR |  | 50           |
|                            |    |                          |     |  |              |
|                            |    | <b>Total Individuals</b> |     |  | <b>2,914</b> |
|                            |    |                          |     |  |              |

**Table S1B. The 8 populations from Henn et al. (2012) included in combined analysis with the 65 populations in Table S1A.**

| <b>Geographical Region</b> | <b>Order</b> | <b>Population Sample</b>   | <b>Population Abbreviation</b> | <b>Number of Individuals</b> |
|----------------------------|--------------|----------------------------|--------------------------------|------------------------------|
| <b>North Africa</b>        | 12.1         | Saharawi                   | SRW                            | 18                           |
|                            | 12.2         | Moroccans, South           | MRS                            | 16                           |
|                            | 12.3         | Moroccans, North           | MRN                            | 18                           |
|                            | 12.4         | Algerians                  | ALG                            | 19                           |
|                            | 12.5         | Tunisians—Chenini, Douiret | TNS                            | 18                           |
|                            | 20.1         | Libyans—in/near Tripoli    | LIB                            | 17                           |
|                            | 20.2         | Egyptians                  | EGY                            | 19                           |
| <b>Europe</b>              | 25.5         | Spanish Basque             | BSQ                            | 20                           |
|                            |              | <b>Total Individuals</b>   |                                | 145                          |

**Note:** Extra detail on the sampling locations for the Tunisians and Libyans in the Henn et al. paper was kindly provided by Dr. David Comas. Chenini and Douiret are Berber villages in the southernmost governate (Tataouine) in Tunisia.

**Table S2.**  
**399 SNPs studied. Ordered by chromosome position;**  
**subset of 159 SNPs organized into 59 haplotypes**

| SNP count | SNPs in 73 pop. analyses | Analyzed as Haplotype or Single SNP | dbSNP rs-number | Chr | GRCh38 nucleotide position | distance to next SNP in basepairs |
|-----------|--------------------------|-------------------------------------|-----------------|-----|----------------------------|-----------------------------------|
| 1         |                          | H1                                  | rs4648344       | 1   | 3,826,568                  | 187                               |
| 2         | yes                      | H1                                  | rs6663840       | 1   | 3,826,755                  | 2,663,561                         |
| 3         |                          | S                                   | rs2986742       | 1   | 6,490,316                  | 6,057,828                         |
| 4         |                          | S                                   | rs6541030       | 1   | 12,548,144                 | 5,296,247                         |
| 5         |                          | S                                   | rs647325        | 1   | 17,844,391                 | 9,760,796                         |
| 6         | yes                      | S                                   | rs4908343       | 1   | 27,605,187                 | 5,063,986                         |
| 7         |                          | S                                   | rs359955        | 1   | 32,669,173                 | 9,225,426                         |
| 8         |                          | S                                   | rs1325502       | 1   | 41,894,599                 | 13,303,100                        |
| 9         | yes                      | S                                   | rs12130799      | 1   | 55,197,699                 | 13,186,305                        |
| 10        |                          | S                                   | rs3118378       | 1   | 68,384,004                 | 7,191,978                         |
| 11        |                          | S                                   | rs10489587      | 1   | 75,575,982                 | 53,767                            |
| 12        |                          | S                                   | rs814856        | 1   | 75,629,749                 | 111,056                           |
| 13        |                          | S                                   | rs12744608      | 1   | 75,740,805                 | 45,845                            |
| 14        |                          | S                                   | rs1146635       | 1   | 75,786,650                 | 80,468                            |
| 15        |                          | S                                   | rs5745429       | 1   | 75,867,118                 | 25,376,889                        |
| 16        |                          | S                                   | rs3737576       | 1   | 101,244,007                | 49,906,006                        |
| 17        |                          | S                                   | rs7554936       | 1   | 151,150,013                | 8,054,880                         |
| 18        |                          | H2                                  | rs2814778       | 1   | 159,204,893                | 671                               |
| 19        |                          | H2                                  | rs12075         | 1   | 159,205,564                | 8,985,088                         |
| 20        | yes                      | S                                   | rs1040404       | 1   | 168,190,652                | 17,989,248                        |
| 21        |                          | S                                   | rs1407434       | 1   | 186,179,900                | 18,641,949                        |
| 22        |                          | S                                   | rs2065160       | 1   | 204,821,849                | 7,791,692                         |
| 23        |                          | S                                   | rs4951629       | 1   | 212,613,541                | 3,847,545                         |
| 24        |                          | H3                                  | rs4528199       | 1   | 216,461,086                | 17                                |
| 25        |                          | H3                                  | rs6604596       | 1   | 216,461,103                | 14,248,945                        |
| 26        |                          | S                                   | rs699           | 1   | 230,710,048                | 489,803                           |
| 27        | yes                      | S                                   | rs11122250      | 1   | 231,199,851                | 10,979,351                        |
| 28        |                          | S                                   | rs316873        | 1   | 242,179,202                |                                   |
| 29        | yes                      | S                                   | rs798443        | 2   | 7,828,144                  | 6,788,081                         |
| 30        |                          | S                                   | rs7421394       | 2   | 14,616,225                 | 2,565,076                         |
| 31        |                          | S                                   | rs1876482       | 2   | 17,181,301                 | 538,917                           |
| 32        |                          | S                                   | rs1834619       | 2   | 17,720,218                 | 11,595,327                        |
| 33        |                          | S                                   | rs4666200       | 2   | 29,315,545                 | 8,398,708                         |
| 34        |                          | S                                   | rs4670767       | 2   | 37,714,253                 | 23,153,857                        |
| 35        |                          | S                                   | rs842639        | 2   | 60,868,110                 | 39,612,388                        |
| 36        |                          | S                                   | rs1519654       | 2   | 100,480,498                | 331,159                           |
| 37        |                          | S                                   | rs7580771       | 2   | 100,811,657                | 163,185                           |
| 38        |                          | S                                   | rs2305160       | 2   | 100,974,842                | 7,922,303                         |
| 39        |                          | H4                                  | rs3827760       | 2   | 108,897,145                | 455                               |
| 40        |                          | H4                                  | rs2169812       | 2   | 108,897,600                | 136                               |
| 41        |                          | H4                                  | rs2378217       | 2   | 108,897,736                | 272                               |

|    |     |     |            |   |             |            |
|----|-----|-----|------------|---|-------------|------------|
| 42 |     | H4  | rs940928   | 2 | 108,898,008 | 22,320     |
| 43 |     | H5  | rs260642   | 2 | 108,920,328 | 7,268      |
| 44 |     | H5  | rs13397666 | 2 | 108,927,596 | 18,443     |
| 45 |     | H5  | rs260714   | 2 | 108,946,039 | 17,243     |
| 46 |     | H5  | rs260690   | 2 | 108,963,282 | 6,575      |
| 47 | yes | H6  | rs260694   | 2 | 108,969,857 | 58         |
| 48 |     | H6  | rs11123719 | 2 | 108,969,915 | 66         |
| 49 |     | H6  | rs11691107 | 2 | 108,969,981 | 26,227,246 |
| 50 |     | S   | rs1375131  | 2 | 135,197,227 | 600,687    |
| 51 |     | S   | rs1807356  | 2 | 135,797,914 | 152,498    |
| 52 |     | S   | rs6754311  | 2 | 135,950,412 | 9,061,964  |
| 53 |     | S   | rs10496971 | 2 | 145,012,376 | 4,085,207  |
| 54 |     | H7  | rs2170607  | 2 | 149,097,583 | 156        |
| 55 |     | H7  | rs10497052 | 2 | 149,097,739 | 2,860,211  |
| 56 | yes | S   | rs4664511  | 2 | 151,957,950 | 2,085,862  |
| 57 | yes | S   | rs1863086  | 2 | 154,043,812 | 3,766,893  |
| 58 | yes | S   | rs10497191 | 2 | 157,810,705 | 119,652    |
| 59 |     | S   | rs6737672  | 2 | 157,930,357 | 20,811,454 |
| 60 |     | S   | rs2627037  | 2 | 178,741,811 | 21,415,420 |
| 61 | yes | S   | rs1569175  | 2 | 200,157,231 | 15,207,738 |
| 62 | yes | S   | rs11651    | 2 | 215,364,969 | 16,488,363 |
| 63 |     | S   | rs3098610  | 2 | 231,853,332 | 6,424,616  |
| 64 | yes | S   | rs2304672  | 2 | 238,277,948 |            |
| 65 |     | S   | rs10510228 | 3 | 2,167,148   | 20,168,255 |
| 66 |     | S   | rs9880567  | 3 | 22,335,403  | 8,038,717  |
| 67 | yes | S   | rs4955316  | 3 | 30,374,120  | 8,730,818  |
| 68 |     | S   | rs9809104  | 3 | 39,104,938  | 7,205,926  |
| 69 |     | H8  | rs4513489  | 3 | 46,310,864  | 29         |
| 70 | yes | H8  | rs6441961  | 3 | 46,310,893  | 204,452    |
| 71 | yes | H9  | rs6808142  | 3 | 46,515,345  | 113        |
| 72 | yes | H9  | rs17030627 | 3 | 46,515,458  | 24,918,843 |
| 73 |     | S   | rs11713996 | 3 | 71,434,301  | 7,916,124  |
| 74 | yes | S   | rs6548616  | 3 | 79,350,425  | 34,800,806 |
| 75 |     | H10 | rs3773678  | 3 | 114,151,231 | 20,711     |
| 76 |     | H10 | rs3732783  | 3 | 114,171,942 | 26         |
| 77 |     | H10 | rs6280     | 3 | 114,171,968 | 6,631,901  |
| 78 |     | S   | rs12629908 | 3 | 120,803,869 | 841,457    |
| 79 |     | S   | rs1919550  | 3 | 121,645,326 | 95,416     |
| 80 |     | S   | rs12498138 | 3 | 121,740,742 | 14,454,892 |
| 81 |     | S   | rs9845457  | 3 | 136,195,634 | 11,836,934 |
| 82 |     | S   | rs734873   | 3 | 148,032,568 | 32,214,371 |
| 83 |     | S   | rs2030763  | 3 | 180,246,939 | 8,610,269  |
| 84 |     | S   | rs1513181  | 3 | 188,857,208 |            |
| 85 | yes | S   | rs9291090  | 4 | 5,388,910   | 32,887,223 |
| 86 | yes | S   | rs11725412 | 4 | 38,276,133  | 537,748    |
| 87 |     | S   | rs4833103  | 4 | 38,813,881  | 2,738,466  |
| 88 |     | S   | rs10007810 | 4 | 41,552,347  | 4,760,229  |
| 89 |     | S   | rs279858   | 4 | 46,312,576  | 9,174,142  |
| 90 |     | H11 | rs11133389 | 4 | 55,486,718  | 15,070     |



|     |     |     |            |   |             |            |
|-----|-----|-----|------------|---|-------------|------------|
| 91  |     | H11 | rs11133391 | 4 | 55,501,788  | 45,848     |
| 92  | yes | S   | rs4864548  | 4 | 55,547,636  | 28,840,289 |
| 93  | yes | S   | rs385194   | 4 | 84,387,925  | 14,756,550 |
| 94  |     | S   | rs1800760  | 4 | 99,144,475  | 120,744    |
| 95  |     | H12 | rs1230025  | 4 | 99,265,219  | 15,363     |
| 96  |     | H12 | rs975833   | 4 | 99,280,582  | 11,694     |
| 97  | yes | H12 | rs1229966  | 4 | 99,292,276  | 15,033     |
| 98  | yes | H12 | rs1042026  | 4 | 99,307,309  | 10,646     |
| 99  | yes | H13 | rs4147536  | 4 | 99,317,955  | 207        |
| 100 |     | H13 | rs1229984  | 4 | 99,318,162  | 3,690      |
| 101 |     | H14 | rs1159918  | 4 | 99,321,852  | 436        |
| 102 |     | H14 | rs6810842  | 4 | 99,322,288  | 874        |
| 103 |     | H14 | rs3811801  | 4 | 99,323,162  | 1,170      |
| 104 |     | H14 | rs1693439  | 4 | 99,324,332  | 15,300     |
| 105 |     | H15 | rs698      | 4 | 99,339,632  | 3,176      |
| 106 |     | H15 | rs1693482  | 4 | 99,342,808  | 2,168      |
| 107 |     | H15 | rs2241894  | 4 | 99,344,976  | 38,033     |
| 108 | yes | H16 | rs2584457  | 4 | 99,383,009  | 82         |
| 109 | yes | H16 | rs12648443 | 4 | 99,383,091  | 17,195     |
| 110 | yes | H16 | rs4699748  | 4 | 99,400,286  | 130        |
| 111 |     | H16 | rs2584461  | 4 | 99,400,416  | 22         |
| 112 |     | H16 | rs1442492  | 4 | 99,400,438  | 8,098      |
| 113 | yes | H16 | rs969804   | 4 | 99,408,536  | 6,290      |
| 114 |     | H17 | rs2851011  | 4 | 99,414,826  | 5,878      |
| 115 | yes | H17 | rs971074   | 4 | 99,420,704  | 7,808      |
| 116 |     | H17 | rs1573496  | 4 | 99,428,512  | 188,552    |
| 117 | yes | S   | rs1491238  | 4 | 99,617,064  | 4,837,202  |
| 118 | yes | S   | rs7657799  | 4 | 104,454,266 | 44,359,550 |
| 119 | yes | S   | rs1403454  | 4 | 148,813,816 | 29,664,553 |
| 120 | yes | S   | rs2702414  | 4 | 178,478,369 | 8,138,610  |
| 121 |     | H18 | rs1280100  | 4 | 186,616,979 | 197        |
| 122 |     | H18 | rs1280099  | 4 | 186,617,176 |            |
| 123 | yes | S   | rs316598   | 5 | 2,364,512   | 4,480,392  |
| 124 |     | H19 | rs870348   | 5 | 6,844,904   | 18         |
| 125 |     | H19 | rs870347   | 5 | 6,844,922   | 2,774,871  |
| 126 |     | H20 | rs41461    | 5 | 9,619,793   | 9,624      |
| 127 |     | H20 | rs2234233  | 5 | 9,629,417   | 24,286,291 |
| 128 |     | H21 | rs11955798 | 5 | 33,915,708  | 14,441     |
| 129 |     | H21 | rs7737265  | 5 | 33,930,149  | 21,439     |
| 130 |     | H21 | rs16891982 | 5 | 33,951,588  | 7,266      |
| 131 |     | H21 | rs28777    | 5 | 33,958,854  | 4,911      |
| 132 |     | H22 | rs26722    | 5 | 33,963,765  | 1,068      |
| 133 |     | H22 | rs35408    | 5 | 33,964,833  | 80,993     |
| 134 |     | S   | rs9292521  | 5 | 34,045,826  | 991,184    |
| 135 | yes | S   | rs37369    | 5 | 35,037,010  | 8,674,266  |
| 136 |     | S   | rs6451722  | 5 | 43,711,276  | 36,078,627 |
| 137 | yes | S   | rs12657828 | 5 | 79,789,903  | 14,703,039 |
| 138 |     | S   | rs12652655 | 5 | 94,492,942  | 22,803,569 |
| 139 |     | S   | rs2220858  | 5 | 117,296,511 | 862,434    |

|     |     |     |            |   |             |            |
|-----|-----|-----|------------|---|-------------|------------|
| 140 |     | S   | rs10079352 | 5 | 118,158,945 | 48,154,032 |
| 141 |     | S   | rs1500127  | 5 | 166,312,977 | 4,463,003  |
| 142 |     | S   | rs7722456  | 5 | 170,775,980 |            |
| 143 |     | S   | rs12203592 | 6 | 396,321     | 4,350,604  |
| 144 |     | S   | rs1040045  | 6 | 4,746,925   | 7,787,954  |
| 145 | yes | S   | rs2504853  | 6 | 12,534,879  | 3,116,022  |
| 146 |     | S   | rs760761   | 6 | 15,650,901  | 9,739      |
| 147 |     | S   | rs909706   | 6 | 15,660,640  | 6,250,745  |
| 148 | yes | S   | rs7745461  | 6 | 21,911,385  | 29,835,287 |
| 149 | yes | S   | rs2397060  | 6 | 51,746,672  | 18,782,002 |
| 150 |     | S   | rs2842063  | 6 | 70,528,674  | 19,279,885 |
| 151 |     | S   | rs192655   | 6 | 89,808,559  | 31,228,078 |
| 152 |     | S   | rs1935946  | 6 | 121,036,637 | 15,124,952 |
| 153 |     | S   | rs3823159  | 6 | 136,161,589 | 8,572,606  |
| 154 |     | S   | rs4463276  | 6 | 144,734,195 | 18,066,565 |
| 155 |     | S   | rs4458655  | 6 | 162,800,760 | 5,464,320  |
| 156 |     | S   | rs1871428  | 6 | 168,265,080 |            |
| 157 |     | S   | rs3779009  | 7 | 2,164,057   | 24,971,619 |
| 158 | yes | S   | rs12533947 | 7 | 27,135,676  | 112,746    |
| 159 |     | H23 | rs2214412  | 7 | 27,248,422  | 15,591     |
| 160 | yes | H23 | rs6943291  | 7 | 27,264,013  | 868,954    |
| 161 |     | S   | rs917115   | 7 | 28,132,967  | 4,006,545  |
| 162 |     | S   | rs32314    | 7 | 32,139,512  | 10,200,960 |
| 163 |     | S   | rs2330442  | 7 | 42,340,472  | 31,699,397 |
| 164 | yes | S   | rs4717865  | 7 | 74,039,869  | 9,863,862  |
| 165 |     | S   | rs10954737 | 7 | 83,903,731  | 13,200,929 |
| 166 |     | S   | rs17168174 | 7 | 97,104,660  | 15,040     |
| 167 |     | S   | rs7794886  | 7 | 97,119,700  | 946,351    |
| 168 |     | S   | rs705308   | 7 | 98,066,051  | 1,602,644  |
| 169 |     | S   | rs4646450  | 7 | 99,668,695  | 95,148     |
| 170 |     | S   | rs2242480  | 7 | 99,763,843  | 17,977,909 |
| 171 | yes | S   | rs10249419 | 7 | 117,741,752 | 13,315,555 |
| 172 |     | S   | rs7803075  | 7 | 131,057,307 | 8,690,271  |
| 173 | yes | S   | rs10236187 | 7 | 139,747,578 | 2,225,327  |
| 174 |     | H24 | rs1726866  | 7 | 141,972,905 | 640        |
| 175 |     | H24 | rs713598   | 7 | 141,973,545 |            |
| 176 |     | S   | rs10108270 | 8 | 4,333,271   | 7,405,049  |
| 177 | yes | H25 | rs1390950  | 8 | 11,738,320  | 140        |
| 178 | yes | H25 | rs2898295  | 8 | 11,738,460  | 17,345,328 |
| 179 |     | S   | rs1471939  | 8 | 29,083,788  | 2,864,744  |
| 180 |     | H26 | rs383632   | 8 | 31,948,532  | 2,046      |
| 181 | yes | H26 | rs385396   | 8 | 31,950,578  | 88,498     |
| 182 |     | S   | rs1462906  | 8 | 32,039,076  | 10,152,774 |
| 183 |     | S   | rs732612   | 8 | 42,191,850  | 147,073    |
| 184 |     | S   | rs3136717  | 8 | 42,338,923  | 11,453,070 |
| 185 |     | S   | rs4737761  | 8 | 53,791,993  | 5,221,066  |
| 186 |     | S   | rs310362   | 8 | 59,013,059  | 4,295,037  |
| 187 |     | S   | rs7837234  | 8 | 63,308,096  | 22,204,291 |
| 188 | yes | S   | rs12544346 | 8 | 85,512,387  | 24,077,701 |

|     |     |     |            |    |             |            |
|-----|-----|-----|------------|----|-------------|------------|
| 189 |     | S   | rs6990312  | 8  | 109,590,088 | 11,521,974 |
| 190 |     | S   | rs2196051  | 8  | 121,112,062 | 784,202    |
| 191 |     | S   | rs7844723  | 8  | 121,896,264 | 17,332,674 |
| 192 | yes | S   | rs2001907  | 8  | 139,228,938 | 5,185,359  |
| 193 |     | S   | rs1871534  | 8  | 144,414,297 |            |
| 194 |     | S   | rs4741658  | 9  | 2,241,994   | 10,430,103 |
| 195 | yes | H27 | rs1408799  | 9  | 12,672,097  | 223        |
| 196 |     | H27 | rs1408801  | 9  | 12,672,320  | 36,985     |
| 197 |     | H28 | rs683      | 9  | 12,709,305  | 730        |
| 198 |     | H28 | rs910      | 9  | 12,710,035  | 1,344,583  |
| 199 |     | S   | rs10961356 | 9  | 14,054,618  | 2,740,670  |
| 200 |     | S   | rs10962599 | 9  | 16,795,288  | 11,833,214 |
| 201 |     | S   | rs10511828 | 9  | 28,628,502  | 40,415,862 |
| 202 | yes | S   | rs3793451  | 9  | 69,044,364  | 16,350,525 |
| 203 |     | S   | rs1867958  | 9  | 85,394,889  | 31,973,038 |
| 204 | yes | S   | rs10513300 | 9  | 117,367,927 | 7,137,483  |
| 205 |     | S   | rs3814134  | 9  | 124,505,410 | 10,019,859 |
| 206 |     | H29 | rs3118582  | 9  | 134,525,269 | 193        |
| 207 |     | H29 | rs10776839 | 9  | 134,525,462 |            |
| 208 | yes | S   | rs3793791  | 10 | 49,633,658  | 23,907,578 |
| 209 | yes | S   | rs4746136  | 10 | 73,541,236  | 19,620,072 |
| 210 |     | S   | rs4918664  | 10 | 93,161,308  | 1,600,592  |
| 211 |     | S   | rs12248560 | 10 | 94,761,900  | 175,595    |
| 212 |     | H30 | rs4918758  | 10 | 94,937,495  | 4,795      |
| 213 |     | H30 | rs1799853  | 10 | 94,942,290  | 9,974,093  |
| 214 |     | S   | rs4917432  | 10 | 104,916,383 | 126,088    |
| 215 | yes | H31 | rs1670008  | 10 | 105,042,471 | 15,225     |
| 216 |     | H31 | rs6584650  | 10 | 105,057,696 | 213,327    |
| 217 |     | S   | rs2930457  | 10 | 105,271,023 | 27,565,576 |
| 218 | yes | S   | rs4880436  | 10 | 132,836,599 |            |
| 219 |     | S   | rs6357     | 11 | 2,167,008   | 2,921,830  |
| 220 |     | S   | rs2499936  | 11 | 5,088,838   | 167,168    |
| 221 | yes | S   | rs2855122  | 11 | 5,256,006   | 2,572,763  |
| 222 |     | S   | rs10839880 | 11 | 7,828,769   | 7,987,822  |
| 223 |     | S   | rs1837606  | 11 | 15,816,591  | 8,172,393  |
| 224 |     | S   | rs2946788  | 11 | 23,988,984  | 21,893,078 |
| 225 |     | S   | rs2292910  | 11 | 45,882,062  | 15,947,678 |
| 226 | yes | H32 | rs174570   | 11 | 61,829,740  | 760        |
| 227 |     | H32 | rs1535     | 11 | 61,830,500  | 11,778     |
| 228 | yes | H32 | rs174583   | 11 | 61,842,278  | 5,288,743  |
| 229 | yes | S   | rs11227699 | 11 | 67,131,021  | 22,146,857 |
| 230 | yes | S   | rs1393350  | 11 | 89,277,878  | 23,962,901 |
| 231 |     | H33 | rs2303377  | 11 | 113,240,779 | 164        |
| 232 |     | H33 | rs2303378  | 11 | 113,240,943 | 89,044     |
| 233 |     | H34 | rs2303380  | 11 | 113,329,987 | 10,661     |
| 234 | yes | H34 | rs10891537 | 11 | 113,340,648 | 59,458     |
| 235 |     | H35 | rs1800497  | 11 | 113,400,106 | 8,602      |
| 236 |     | H35 | rs2242592  | 11 | 113,408,708 | 2,845      |
| 237 | yes | H35 | rs1124492  | 11 | 113,411,553 | 1,184      |

|     |     |     |            |    |             |            |
|-----|-----|-----|------------|----|-------------|------------|
| 238 |     | H35 | rs6277     | 11 | 113,412,737 | 18         |
| 239 |     | H35 | rs6275     | 11 | 113,412,755 | 5,705      |
| 240 | yes | H36 | rs1079727  | 11 | 113,418,460 | 116        |
| 241 | yes | H36 | rs2002453  | 11 | 113,418,576 | 2,450      |
| 242 |     | H36 | rs2234690  | 11 | 113,421,026 | 4,538      |
| 243 |     | H36 | rs1079597  | 11 | 113,425,564 | 7,348,174  |
| 244 |     | S   | rs948028   | 11 | 120,773,738 |            |
| 245 |     | S   | rs2857234  | 12 | 6,796,015   | 60,015     |
| 246 | yes | S   | rs2226955  | 12 | 6,856,030   | 4,692,524  |
| 247 |     | S   | rs2416791  | 12 | 11,548,554  | 5,706,304  |
| 248 |     | S   | rs1513056  | 12 | 17,254,858  | 7,951,036  |
| 249 | yes | H37 | rs12587    | 12 | 25,205,894  | 3,724      |
| 250 | yes | H37 | rs712      | 12 | 25,209,618  | 225        |
| 251 |     | H37 | rs1137282  | 12 | 25,209,843  | 21,036     |
| 252 | yes | H37 | rs17329025 | 12 | 25,230,879  | 1,308,560  |
| 253 |     | S   | rs708156   | 12 | 26,539,439  | 1,043,614  |
| 254 | yes | S   | rs1975920  | 12 | 27,583,053  | 28,186,897 |
| 255 |     | S   | rs772262   | 12 | 55,769,950  | 47,082,074 |
| 256 |     | H38 | rs1722383  | 12 | 102,852,024 | 14,832     |
| 257 | yes | H38 | rs2133298  | 12 | 102,866,856 | 185        |
| 258 |     | H38 | rs3817446  | 12 | 102,867,041 | 6,016,903  |
| 259 |     | S   | rs2070586  | 12 | 108,883,944 | 2,671,964  |
| 260 |     | H39 | rs7969300  | 12 | 111,555,908 | 174        |
| 261 |     | H39 | rs593226   | 12 | 111,556,082 | 9,497      |
| 262 |     | H39 | rs616513   | 12 | 111,565,579 | 40,950     |
| 263 |     | S   | rs3809274  | 12 | 111,606,529 | 150,643    |
| 264 |     | H40 | rs737280   | 12 | 111,757,172 | 16,857     |
| 265 |     | H40 | rs2238151  | 12 | 111,774,029 | 29,933     |
| 266 |     | H40 | rs671      | 12 | 111,803,962 | 6,647,721  |
| 267 | yes | H41 | rs1503767  | 12 | 118,451,683 | 71         |
| 268 |     | H41 | rs11068953 | 12 | 118,451,754 |            |
| 269 |     | S   | rs7997709  | 13 | 34,273,600  | 6,867,546  |
| 270 | yes | S   | rs1572018  | 13 | 41,141,146  | 864,703    |
| 271 |     | S   | rs2166624  | 13 | 42,005,849  | 6,490,527  |
| 272 |     | S   | rs7326934  | 13 | 48,496,376  | 1,817,048  |
| 273 |     | H42 | rs806301   | 13 | 50,313,424  | 165        |
| 274 |     | H42 | rs2066700  | 13 | 50,313,589  | 25,106,162 |
| 275 | yes | S   | rs9530435  | 13 | 75,419,751  | 35,755,069 |
| 276 |     | S   | rs9522149  | 13 | 111,174,820 |            |
| 277 |     | S   | rs1760921  | 14 | 20,349,972  | 31,791,277 |
| 278 | yes | S   | rs2357442  | 14 | 52,141,249  | 5,630,720  |
| 279 | yes | S   | rs1950993  | 14 | 57,771,969  | 9,648,095  |
| 280 | yes | S   | rs8021730  | 14 | 67,420,064  | 6,363,790  |
| 281 |     | H43 | rs12717560 | 14 | 73,783,854  | 158        |
| 282 |     | H43 | rs12878166 | 14 | 73,784,012  | 9,222,512  |
| 283 | yes | S   | rs946918   | 14 | 83,006,524  | 9,300,795  |
| 284 |     | S   | rs12896399 | 14 | 92,307,319  | 6,601,665  |
| 285 | yes | S   | rs200354   | 14 | 98,908,984  | 6,303,734  |
| 286 |     | S   | rs3784230  | 14 | 105,212,718 |            |

|     |     |     |            |    |            |            |
|-----|-----|-----|------------|----|------------|------------|
| 287 |     | S   | rs2703969  | 15 | 27,886,487 | 65,404     |
| 288 |     | H44 | rs1800414  | 15 | 27,951,891 | 10,980     |
| 289 |     | H44 | rs11074314 | 15 | 27,962,871 | 18,524     |
| 290 |     | H44 | rs12914687 | 15 | 27,981,395 | 2,012      |
| 291 |     | H44 | rs74653330 | 15 | 27,983,407 | 1,765      |
| 292 |     | H44 | rs1800407  | 15 | 27,985,172 | 5,455      |
| 293 |     | H44 | rs1800404  | 15 | 27,990,627 | 3,528      |
| 294 |     | H45 | rs2015343  | 15 | 27,994,155 | 26,934     |
| 295 |     | H45 | rs746861   | 15 | 28,021,089 | 22,513     |
| 296 | yes | H45 | rs7170869  | 15 | 28,043,602 | 9,285      |
| 297 | yes | H45 | rs895828   | 15 | 28,052,887 | 37,787     |
| 298 |     | H46 | rs4778138  | 15 | 28,090,674 | 2,893      |
| 299 |     | H46 | rs4778241  | 15 | 28,093,567 | 5,525      |
| 300 |     | H46 | rs7495174  | 15 | 28,099,092 | 12,621     |
| 301 |     | H46 | rs1129038  | 15 | 28,111,713 | 7,200      |
| 302 |     | H47 | rs7494942  | 15 | 28,118,913 | 1,559      |
| 303 | yes | H47 | rs12913832 | 15 | 28,120,472 | 8,394      |
| 304 |     | H47 | rs3935591  | 15 | 28,128,866 | 53,974     |
| 305 |     | S   | rs7170852  | 15 | 28,182,840 | 85,378     |
| 306 | yes | H48 | rs916977   | 15 | 28,268,218 | 16,818     |
| 307 |     | H48 | rs1667394  | 15 | 28,285,036 | 7,642,798  |
| 308 |     | S   | rs12439433 | 15 | 35,927,834 | 8,932,339  |
| 309 |     | S   | rs735480   | 15 | 44,860,173 | 543,324    |
| 310 |     | S   | rs1153849  | 15 | 45,403,497 | 2,615,716  |
| 311 |     | S   | rs9788730  | 15 | 48,019,213 | 80,755     |
| 312 |     | S   | rs1834640  | 15 | 48,099,968 | 34,319     |
| 313 |     | H49 | rs1426654  | 15 | 48,134,287 | 11,785     |
| 314 |     | H49 | rs2469597  | 15 | 48,146,072 | 3,064,575  |
| 315 | yes | S   | rs4646     | 15 | 51,210,647 | 12,595,767 |
| 316 |     | S   | rs10152453 | 15 | 63,806,414 | 10,539,112 |
| 317 | yes | S   | rs11632698 | 15 | 74,345,526 | 96,633     |
| 318 |     | S   | rs2899826  | 15 | 74,442,159 | 309,738    |
| 319 |     | S   | rs2472304  | 15 | 74,751,897 | 16,810,581 |
| 320 |     | S   | rs8035124  | 15 | 91,562,478 |            |
| 321 |     | S   | rs4984913  | 16 | 690,466    | 10,190,988 |
| 322 |     | S   | rs4781011  | 16 | 10,881,454 | 8,380,132  |
| 323 |     | S   | rs2269793  | 16 | 19,261,586 | 6,502,195  |
| 324 | yes | S   | rs17625895 | 16 | 25,763,781 | 3,886,115  |
| 325 | yes | S   | rs11859842 | 16 | 29,649,896 | 18,574,391 |
| 326 |     | S   | rs17822931 | 16 | 48,224,287 | 17,148,518 |
| 327 |     | S   | rs818386   | 16 | 65,372,805 | 19,777,271 |
| 328 | yes | S   | rs2966849  | 16 | 85,150,076 | 34,108     |
| 329 |     | S   | rs3924280  | 16 | 85,184,184 | 4,480,235  |
| 330 |     | S   | rs459920   | 16 | 89,664,419 | 254,614    |
| 331 |     | H50 | rs3212363  | 16 | 89,919,033 | 713        |
| 332 |     | H50 | rs885479   | 16 | 89,919,746 |            |
| 333 |     | S   | rs1879488  | 17 | 1,498,319  | 2,998,742  |
| 334 |     | S   | rs333113   | 17 | 4,497,061  | 25,728,694 |
| 335 |     | S   | rs8071667  | 17 | 30,225,755 | 9,497,580  |

|     |     |     |            |    |            |            |
|-----|-----|-----|------------|----|------------|------------|
| 336 |     | S   | rs1136201  | 17 | 39,723,335 | 755,342    |
| 337 |     | S   | rs749906   | 17 | 40,478,677 | 1,862,192  |
| 338 |     | H51 | rs3869550  | 17 | 42,340,869 | 27,038     |
| 339 |     | H51 | rs957971   | 17 | 42,367,907 | 14,150     |
| 340 | yes | H51 | rs7211777  | 17 | 42,382,057 | 124,458    |
| 341 |     | S   | rs4411548  | 17 | 42,506,515 | 397,713    |
| 342 | yes | S   | rs2593595  | 17 | 42,904,228 | 41,863     |
| 343 |     | S   | rs528854   | 17 | 42,946,091 | 52,841     |
| 344 | yes | S   | rs2271539  | 17 | 42,998,932 | 378,635    |
| 345 |     | S   | rs2061873  | 17 | 43,377,567 | 505,408    |
| 346 |     | S   | rs124719   | 17 | 43,882,975 | 187,862    |
| 347 |     | S   | rs228758   | 17 | 44,070,837 | 1,324,118  |
| 348 |     | H52 | rs1059504  | 17 | 45,394,955 | 186        |
| 349 | yes | H52 | rs8327     | 17 | 45,395,141 | 289,349    |
| 350 |     | S   | rs2049515  | 17 | 45,684,490 | 45,069     |
| 351 | yes | S   | rs2902662  | 17 | 45,729,559 | 73,122     |
| 352 |     | S   | rs110402   | 17 | 45,802,681 | 22,950     |
| 353 |     | H53 | rs1396862  | 17 | 45,825,631 | 4,748      |
| 354 |     | H53 | rs1876831  | 17 | 45,830,379 | 160,594    |
| 355 |     | H54 | rs2435214  | 17 | 45,990,973 | 23,385     |
| 356 |     | H54 | rs75534191 | 17 | 46,014,358 | 1,604,108  |
| 357 |     | S   | rs3760370  | 17 | 47,618,466 | 1,429,074  |
| 358 |     | S   | rs11871214 | 17 | 49,047,540 | 162,165    |
| 359 |     | H55 | rs2233362  | 17 | 49,209,705 | 42         |
| 360 |     | H55 | rs634370   | 17 | 49,209,747 | 1,439,024  |
| 361 |     | S   | rs17642714 | 17 | 50,648,771 | 1,384,034  |
| 362 |     | S   | rs4538057  | 17 | 52,032,805 | 3,458,718  |
| 363 |     | S   | rs4471745  | 17 | 55,491,523 | 219,396    |
| 364 |     | S   | rs2033111  | 17 | 55,710,919 | 9,280,114  |
| 365 |     | S   | rs11652805 | 17 | 64,991,033 | 6,524,925  |
| 366 |     | S   | rs10512572 | 17 | 71,515,958 | 4,270,152  |
| 367 |     | S   | rs2125345  | 17 | 75,786,110 | 2,446,380  |
| 368 |     | H56 | rs11868709 | 17 | 78,232,490 | 59         |
| 369 |     | H56 | rs9907137  | 17 | 78,232,549 |            |
| 370 | yes | S   | rs4798812  | 18 | 9,420,506  | 12,651,515 |
| 371 |     | S   | rs4800105  | 18 | 22,072,021 | 15,625,638 |
| 372 |     | S   | rs2042762  | 18 | 37,697,659 | 5,210,655  |
| 373 | yes | S   | rs7226659  | 18 | 42,908,314 | 18,757,561 |
| 374 | yes | S   | rs881728   | 18 | 61,665,875 | 8,245,820  |
| 375 |     | S   | rs3916235  | 18 | 69,911,695 | 288,732    |
| 376 |     | S   | rs4891825  | 18 | 70,200,427 | 7,143,901  |
| 377 |     | S   | rs874299   | 18 | 77,344,328 |            |
| 378 |     | S   | rs7251928  | 19 | 4,077,098  | 775,027    |
| 379 | yes | H57 | rs1055919  | 19 | 4,852,125  | 200        |
| 380 |     | H57 | rs2271057  | 19 | 4,852,325  | 28,309,016 |
| 381 | yes | S   | rs8113143  | 19 | 33,161,341 | 19,237,311 |
| 382 |     | S   | rs3745099  | 19 | 52,398,652 | 2,704,903  |
| 383 |     | S   | rs2532060  | 19 | 55,103,555 |            |
| 384 |     | S   | rs6104567  | 20 | 10,214,785 | 23,936,021 |

|     |     |     |            |    |            |            |
|-----|-----|-----|------------|----|------------|------------|
| 385 | yes | S   | rs1015362  | 20 | 34,150,806 | 118,386    |
| 386 |     | S   | rs6058017  | 20 | 34,269,192 | 26,859,670 |
| 387 |     | H58 | rs10854214 | 20 | 61,128,862 | 96         |
| 388 |     | H58 | rs10854215 | 20 | 61,128,958 | 1,694,449  |
| 389 |     | S   | rs1985835  | 20 | 62,823,407 |            |
| 390 |     | S   | rs1041740  | 21 | 31,667,849 | 4,845,478  |
| 391 |     | S   | rs2835370  | 21 | 36,513,327 |            |
| 392 |     | S   | rs1296819  | 22 | 17,593,780 | 2,347,581  |
| 393 |     | H59 | rs2020917  | 22 | 19,941,361 | 22,323     |
| 394 |     | H59 | rs4818     | 22 | 19,963,684 | 64         |
| 395 | yes | H59 | rs4680     | 22 | 19,963,748 | 4,421      |
| 396 | yes | H59 | rs9332377  | 22 | 19,968,169 | 12,002,203 |
| 397 |     | S   | rs4821004  | 22 | 31,970,372 | 9,330,962  |
| 398 |     | S   | rs2024566  | 22 | 41,301,334 | 6,510,789  |
| 399 |     | S   | rs5768007  | 22 | 47,812,123 |            |

**Figure S1.** Allele frequency barplot on 65 populations for example haplotype

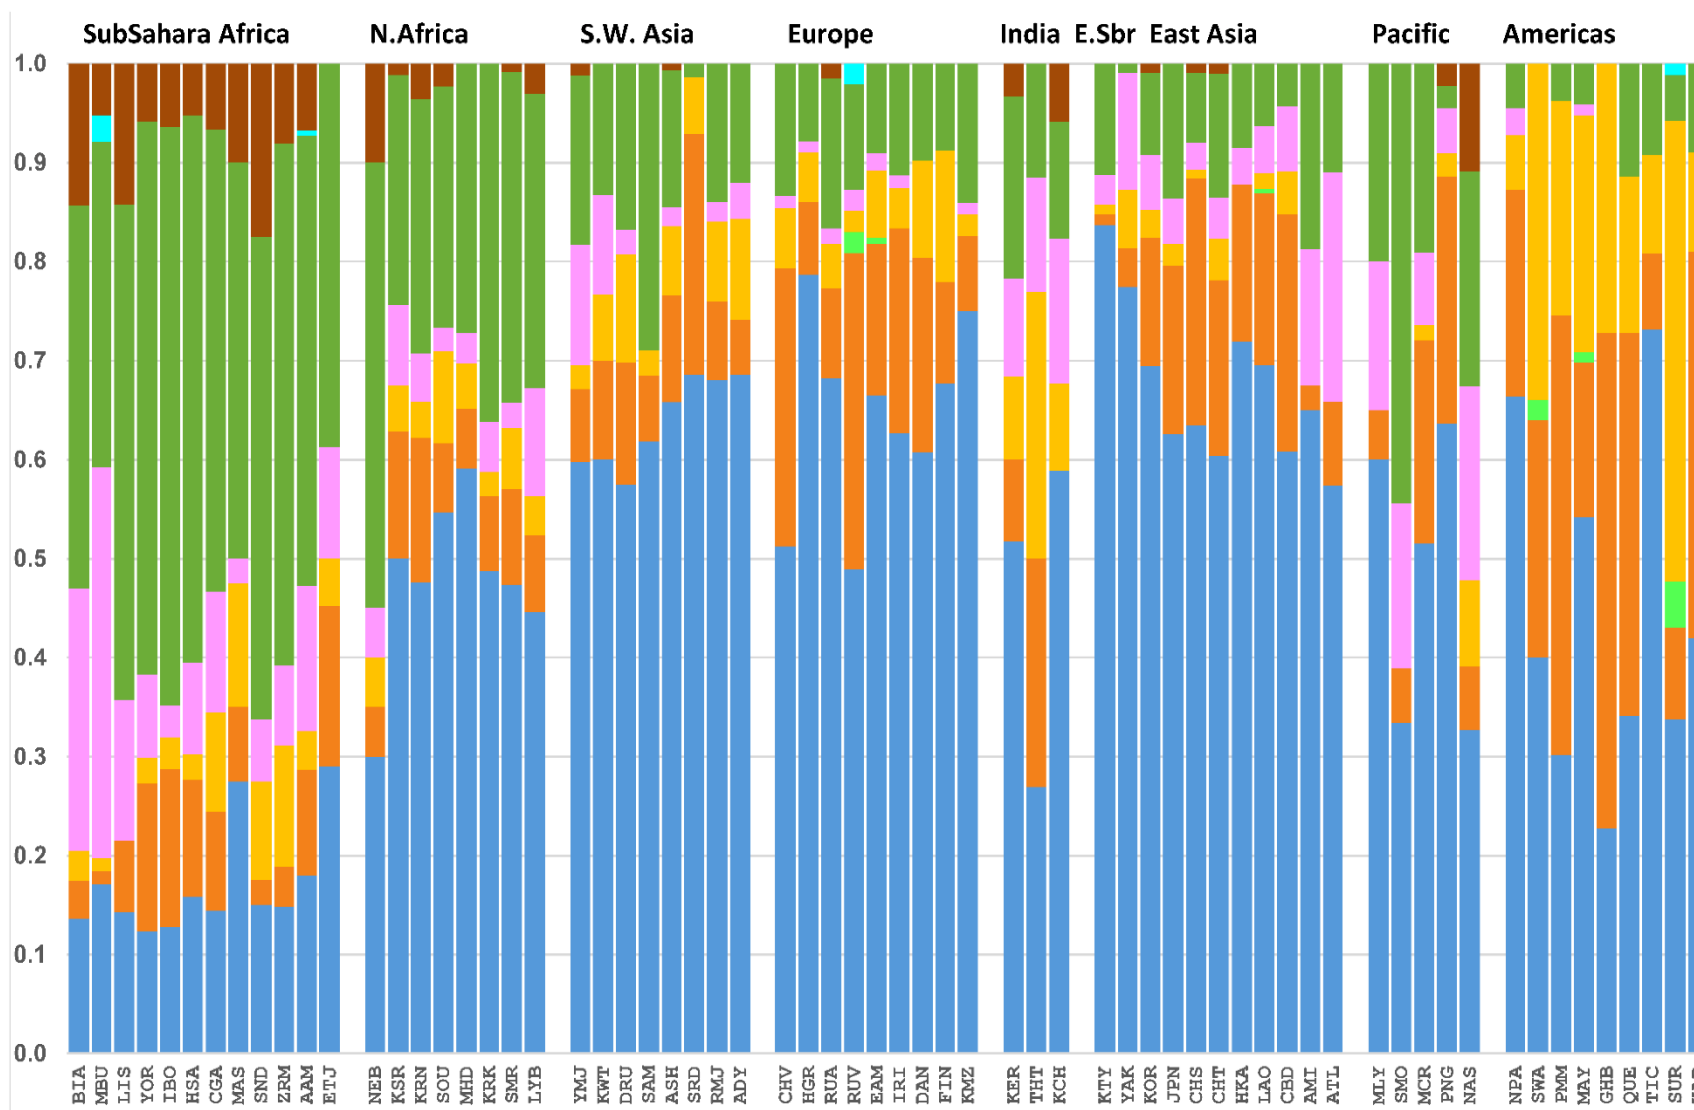



**Figure S2.** Comparing average heterozygosities of populations in 299 marker and 90 marker datasets

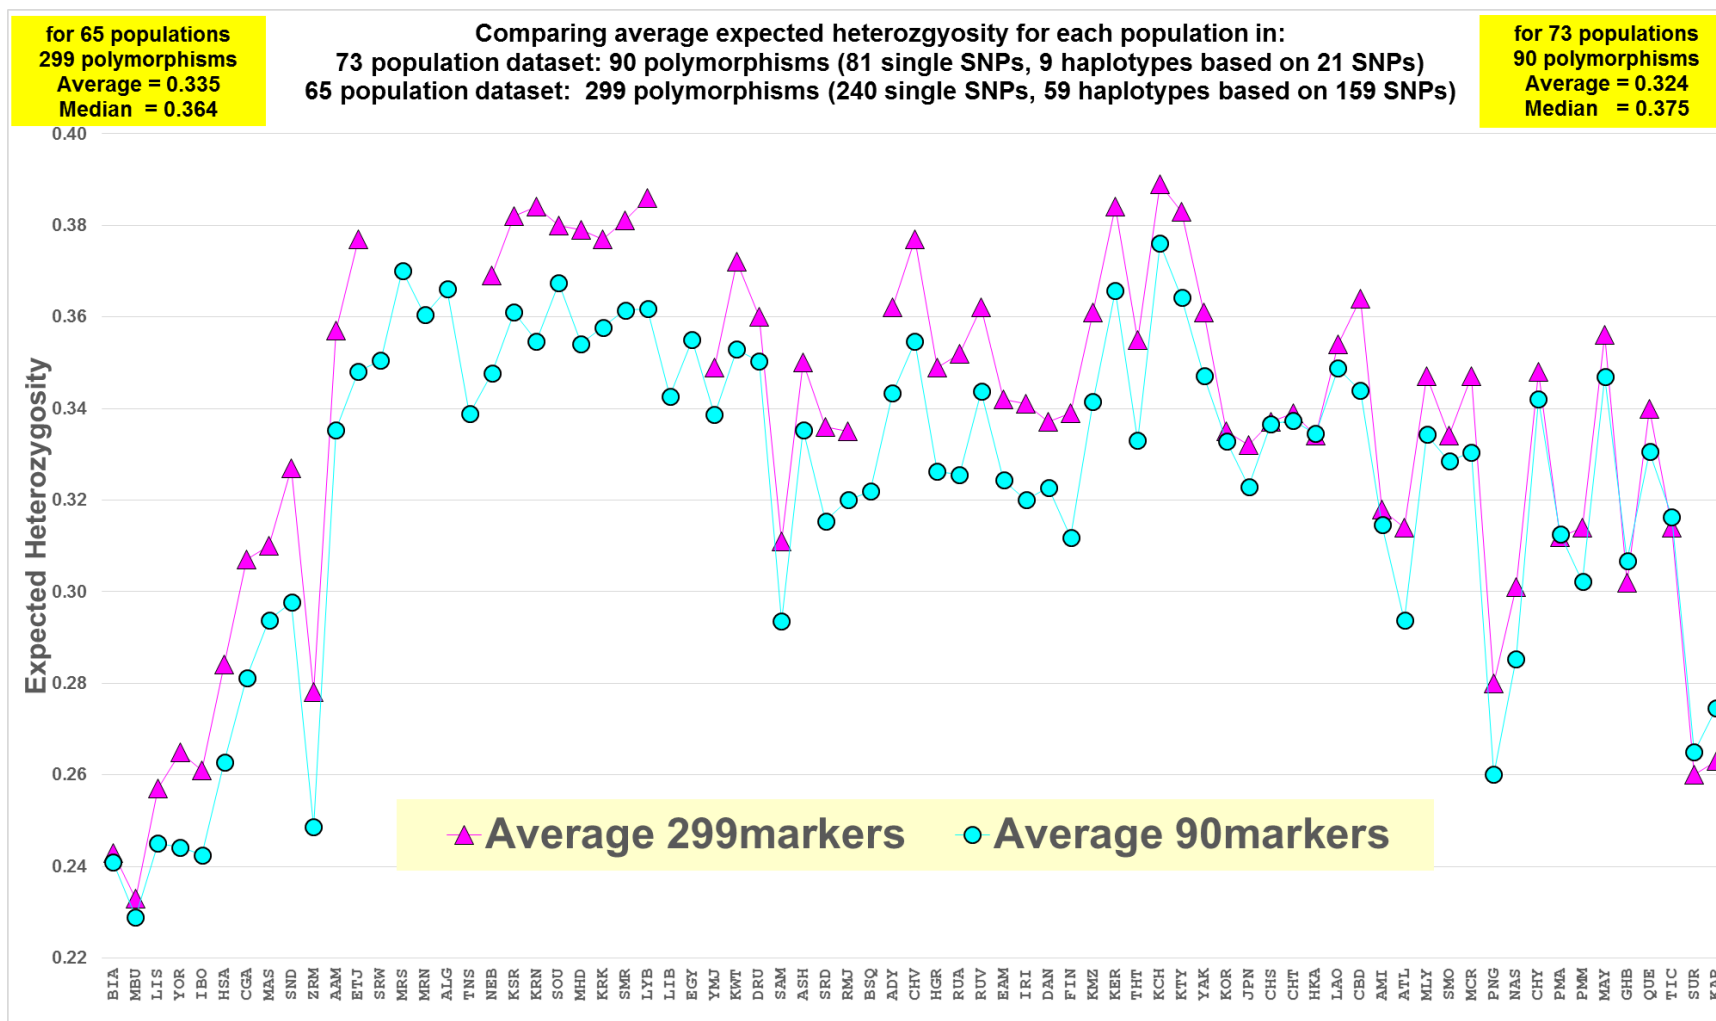

**Figure S3.** Principal Components Analysis plot for pc #1 and pc #3. PCA is based on pairwise Tau genetic distances for 65 populations.

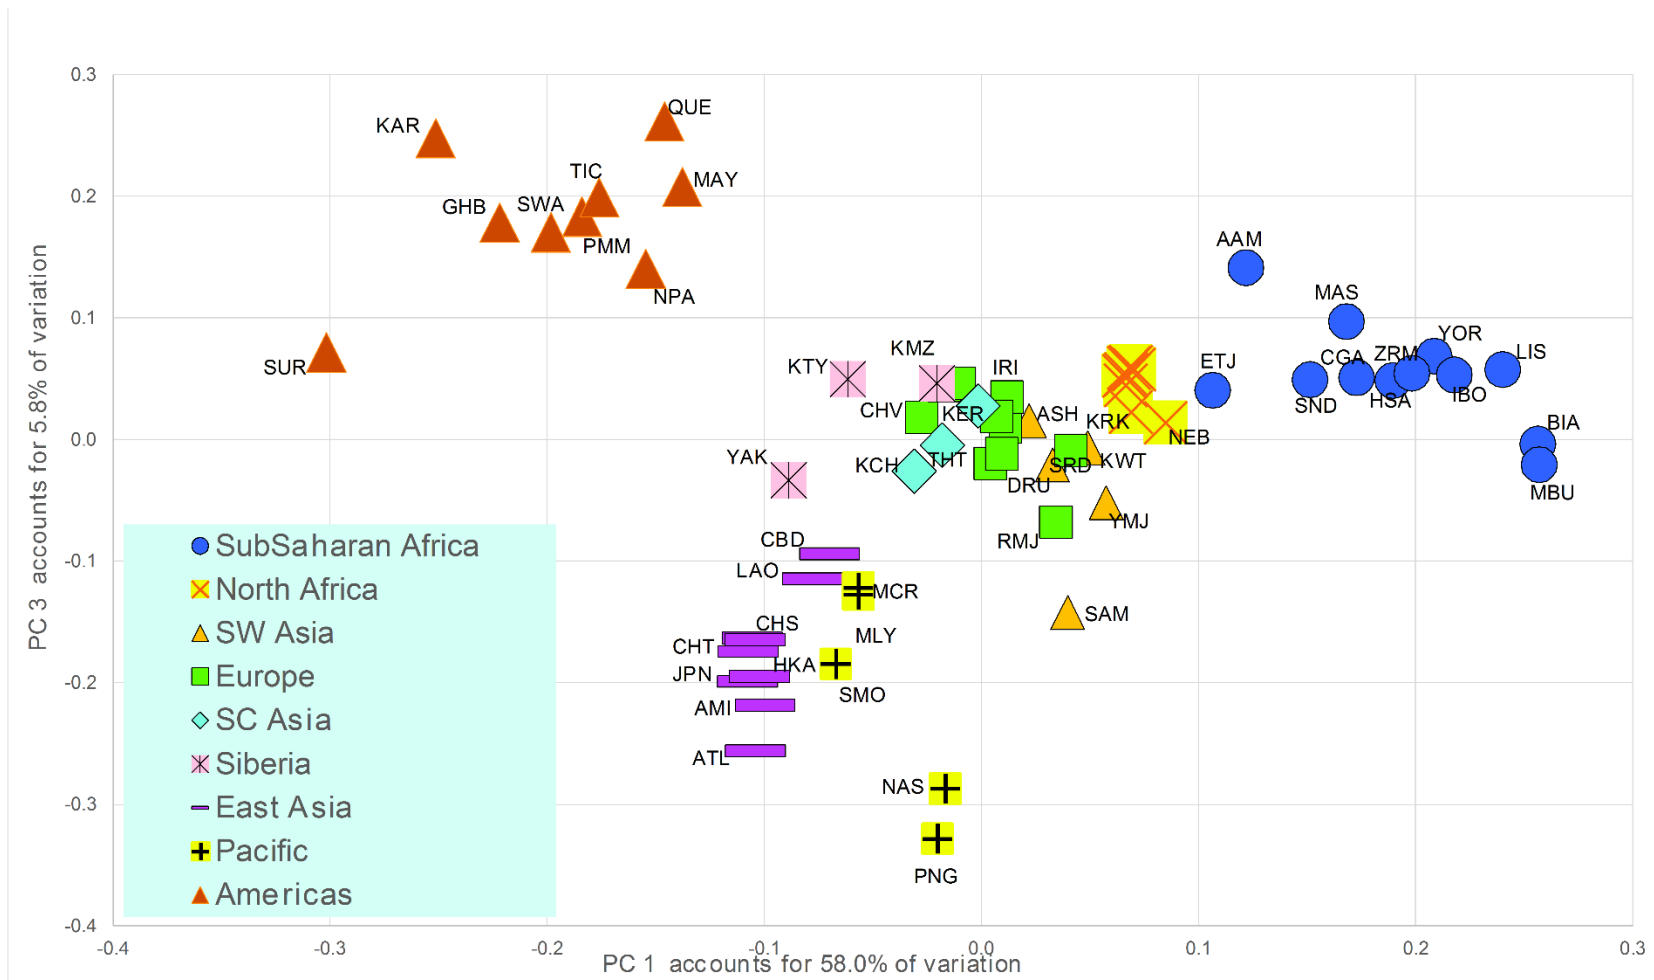

**Figure S4.** Principal Components Analysis plot—73 populations, 90 markers study—pc #1 x pc #2

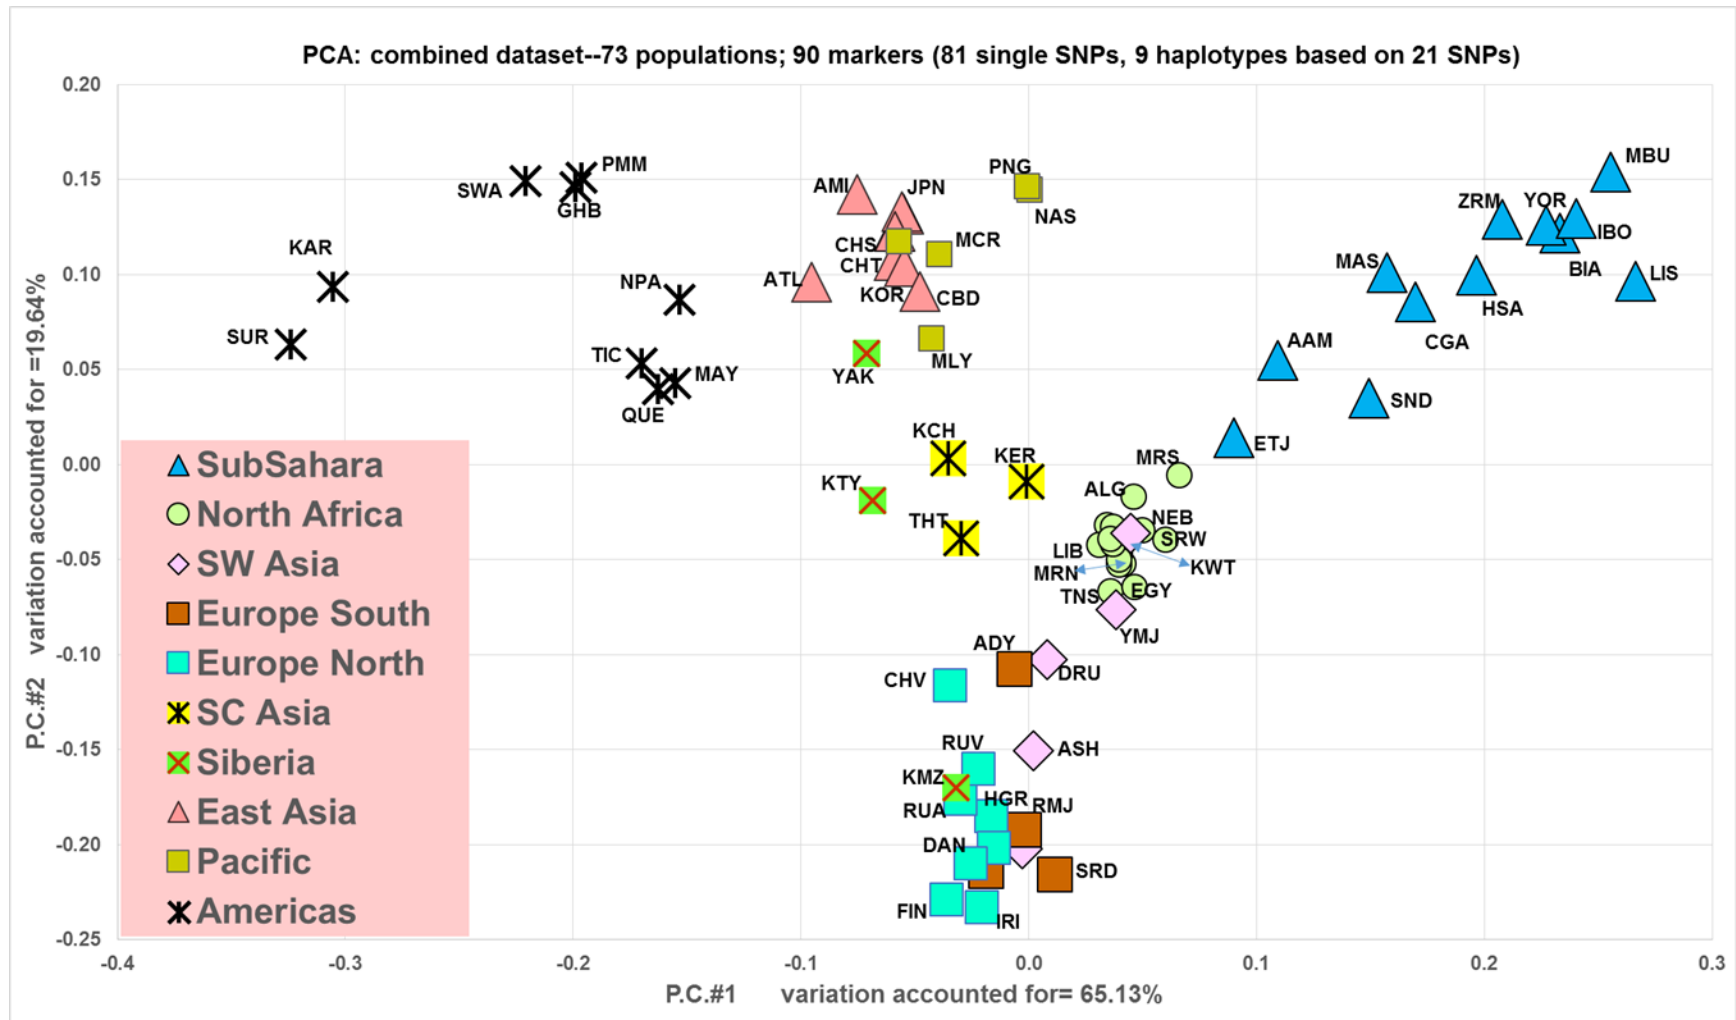

**Figure S5.** Principal Components Analysis plot—73 populations, 90 markers study —pc #1 x pc #3

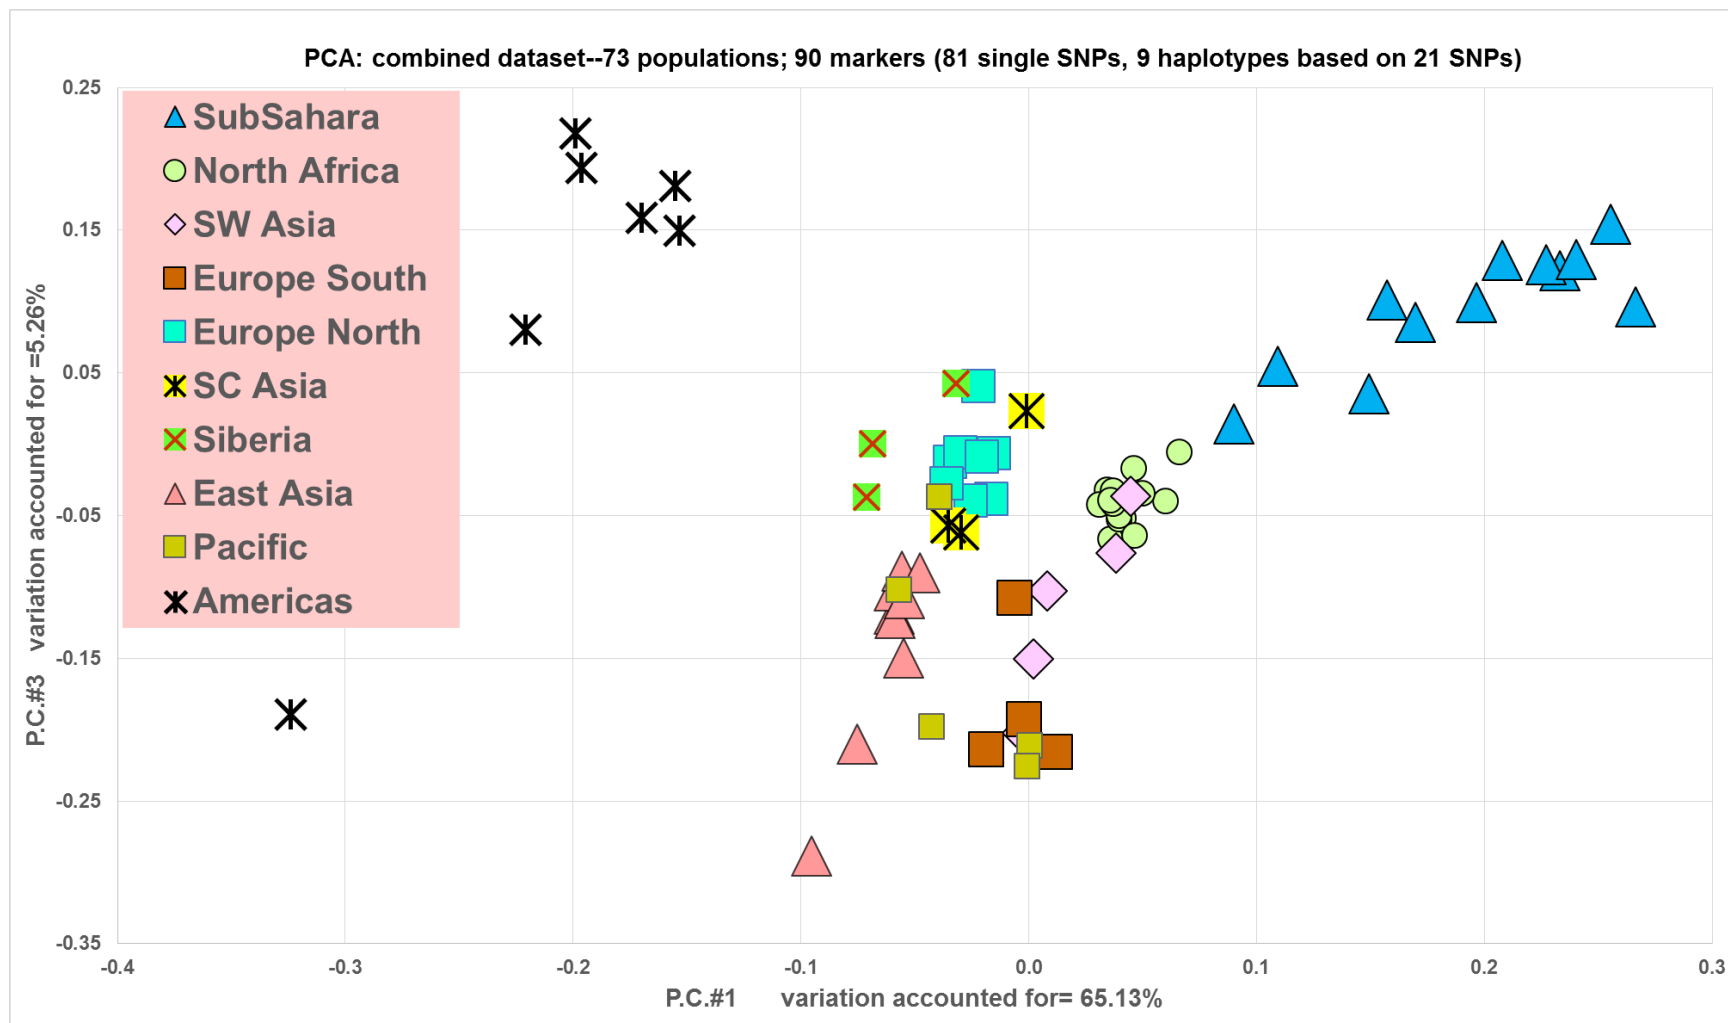

**Figure S6.** STRUCTURE individual bar plots—73 population study, 90 markers study—displaying results for runs with highest likelihood out of 20 runs in each cluster  $K=5$  to 11. Each individual has a separate column in the bar plot and the individuals in a population are clustered together in the display but the STRUCTURE analysis was not informed about an individual's population membership. Black vertical lines identify the population boundaries. The height extent of each color for an individual corresponds to the estimated membership of the individual in one of the clusters; each cluster is assigned a separate color. The bars with multiple colors can be interpreted as genetic admixture or as relative probabilities of belonging to the different clusters. Since there is a separate color bar for each of the more than 3000 individuals, the interval width covered by a population varies and corresponds to the number of individuals in the population.

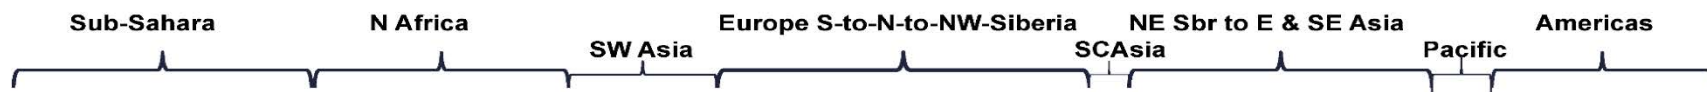

K=5

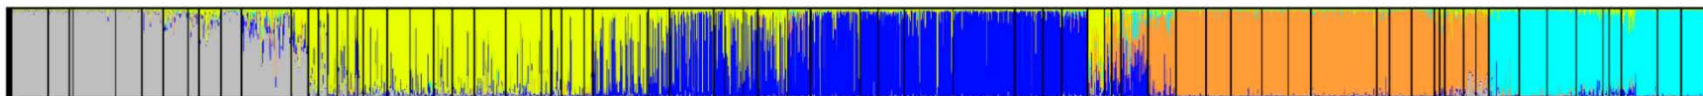

K=6

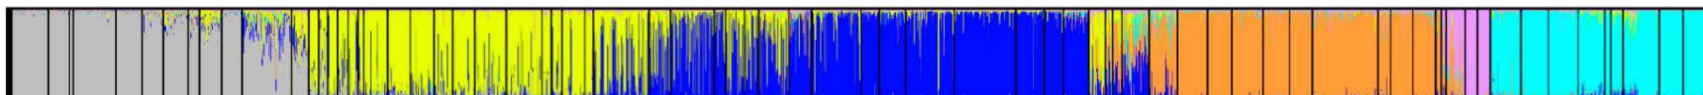

K=7

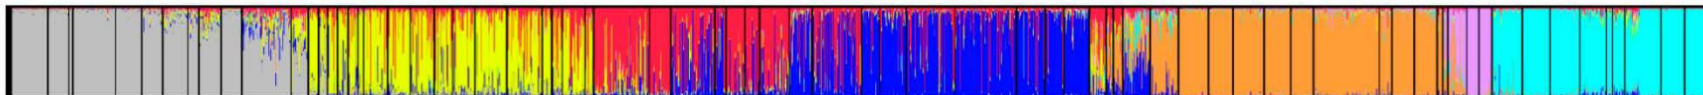

K=8

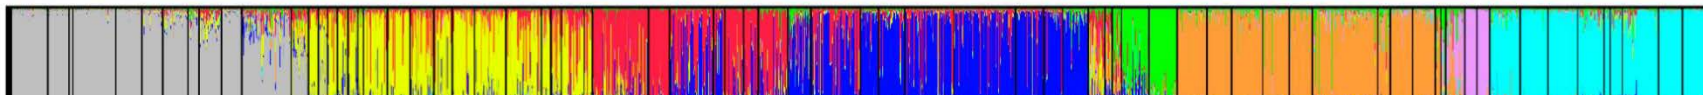

K=9

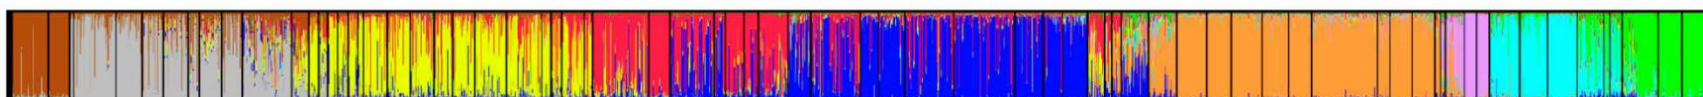

K=10

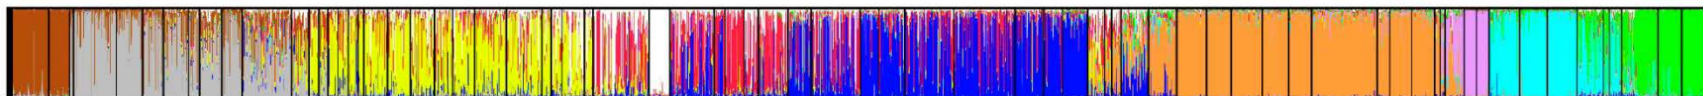

K=11

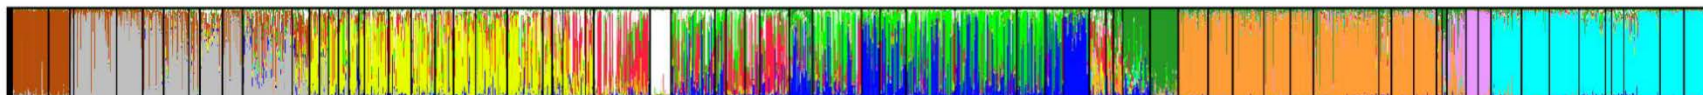

## Supplementary material illustrating variation at functional genes

**Table S3. List of 9 functional SNPs plus 9 nearby non-functional SNPs included in multi-SNP haplotypes**

|         |     | GRCh38      |            |         |     |                |         |                                              |  |
|---------|-----|-------------|------------|---------|-----|----------------|---------|----------------------------------------------|--|
| Gene    | Chr | nt position | dbSNP #    | Anc,Drv | Fn? | Protein change | strand  | human phenotype                              |  |
| EDAR    | 2   | 108,897,145 | rs3827760  | A,G     | yes | Val > Ala      | forward | hair and dental traits                       |  |
| EDAR    | 2   | 108,897,600 | rs2169812  | G,T     | no  |                | forward |                                              |  |
| EDAR    | 2   | 108,897,736 | rs2378217  | C,T     | no  |                | forward |                                              |  |
| EDAR    | 2   | 108,898,008 | rs940928   | C,T     | no  |                | forward |                                              |  |
| ADH1B   | 4   | 99,318,162  | rs1229984  | C,T     | yes | Arg > His      | forward | alcohol metabolism; flushing reaction        |  |
| TAS2R1  | 5   | 9,619,793   | rs41461    | C,T     | no  |                | reverse |                                              |  |
| TAS2R1  | 5   | 9,629,417   | rs2234233  | C,T     | yes |                | reverse | protein coding taste receptor                |  |
| SLC45A2 | 5   | 33,915,708  | rs11955798 | A,G     | no  |                | forward |                                              |  |
| SLC45A2 | 5   | 33,930,149  | rs7737265  | A,G     | no  |                | forward |                                              |  |
| SLC45A2 | 5   | 33,951,588  | rs16891982 | C,G     | yes |                | forward | pigmentation                                 |  |
| SLC45A2 | 5   | 33,958,854  | rs28777    | A,C     | no  |                | forward |                                              |  |
| SLC45A2 | 5   | 33,963,765  | rs26722    | C,T     | yes |                | forward |                                              |  |
| SLC45A2 | 5   | 33,964,833  | rs35408    | C,T     | no  |                | forward |                                              |  |
| TAS2R38 | 7   | 141,972,905 | rs1726866  | C,T     | yes | Ala > Val      | reverse | "PTC"; bitter taste receptor, protein coding |  |
| TAS2R38 | 7   | 141,973,545 | rs713598   | C,G     | yes | Ala > Pro      | reverse | "PTC"; bitter taste receptor, protein coding |  |
| HERC2   | 15  | 28,120,472  | rs12913832 | A,G     | yes |                |         | pigmentation                                 |  |
| MC1R    | 16  | 89,919,033  | rs3212363  | T,A     | no  |                | forward |                                              |  |
| MC1R    | 16  | 89,919,746  | rs885479   | G,A     | yes |                | forward | pigmentation                                 |  |

On the next 11 pages allele frequency bar plots are presented for 9 functional SNPs that are part of the 299 marker polymorphism dataset. In each bar plot the 65 populations are in the same geographical ordering left to right. Blank bars separate some of the major geographical regions to make inspection of the plots easier. Left to right the eight regions include Sub-Saharan Africa, North Africa, SW Asia, Europe, South Central Asia (India), East Asia, Pacific Islands, Americas. See Table S1A for the detailed population list including the 3-character abbreviations. Some of the bar plots display the functional SNP frequencies in the context of multi-SNP haplotypes that include other non-functional SNPs. The tabular list at the top of this page provides details about all eighteen SNPs included in the following eleven bar plots.

Figure S7

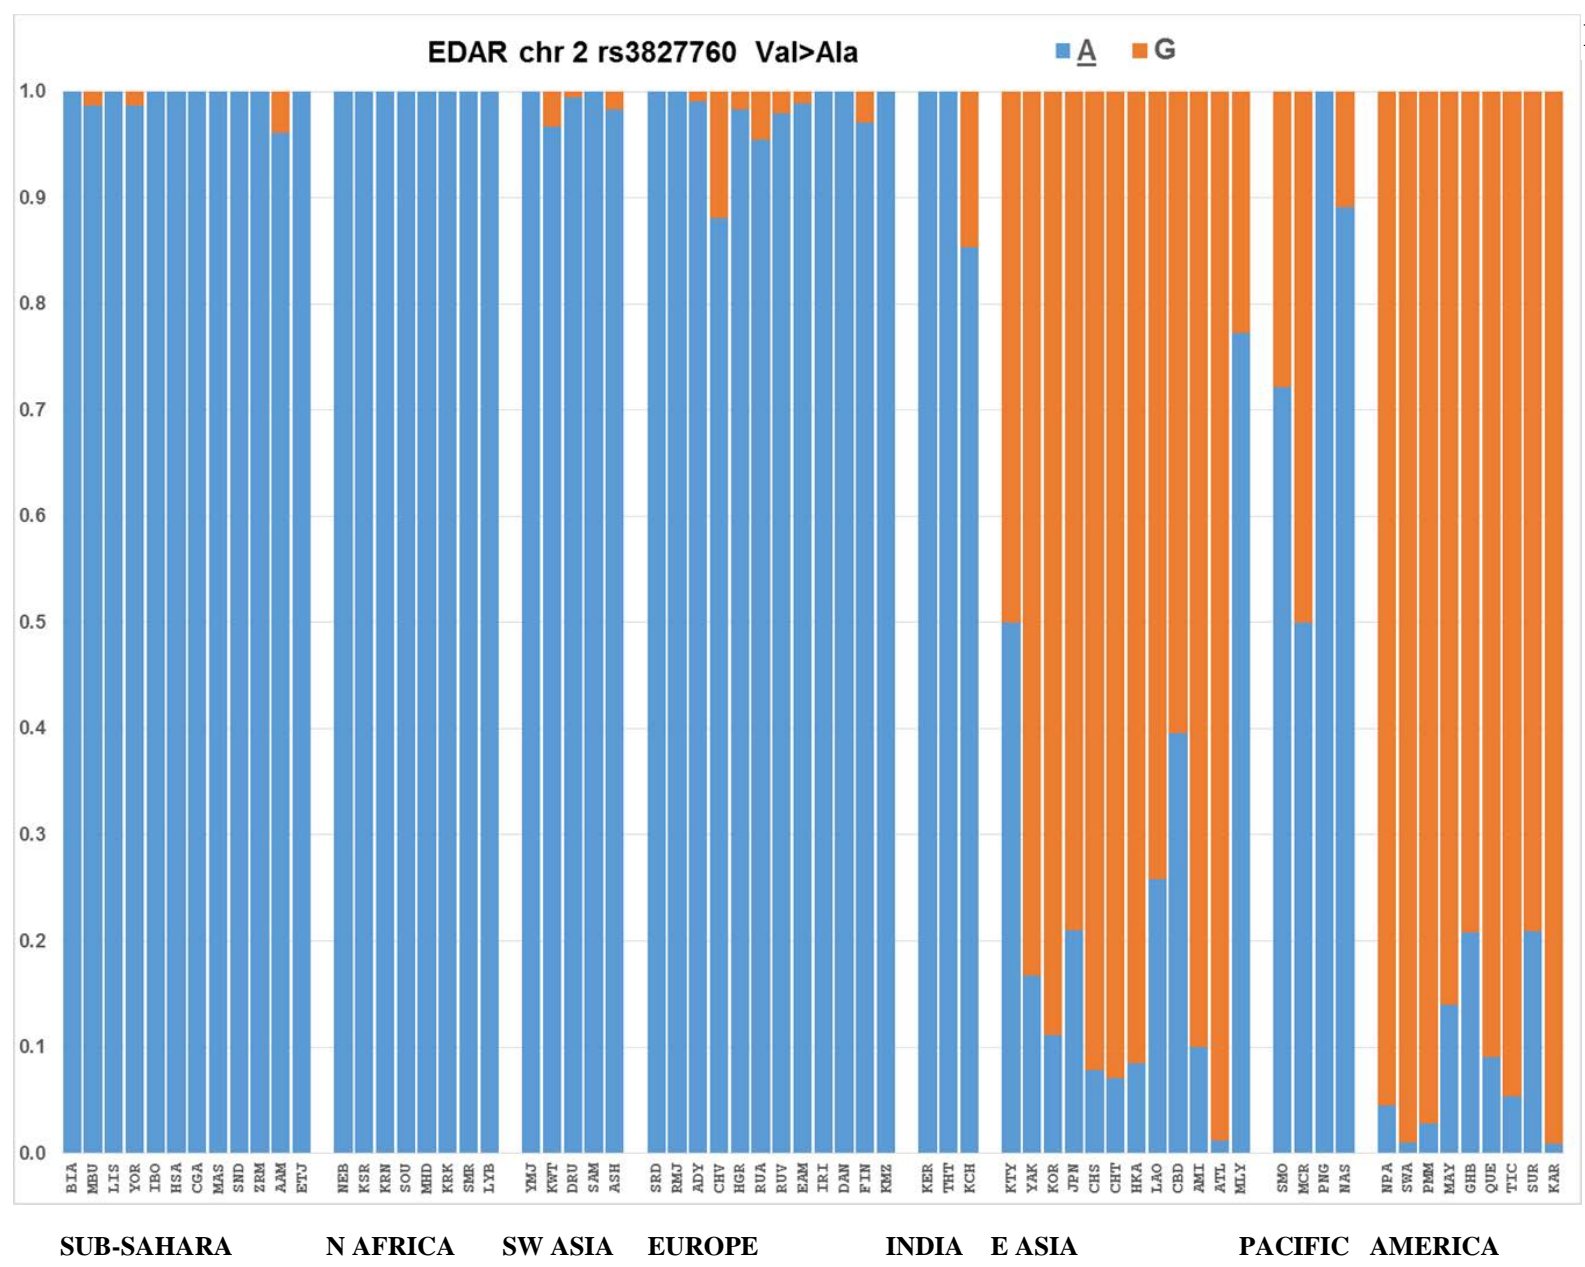

**SUB-SAHARA      N AFRICA      SW ASIA      EUROPE      INDIA      E ASIA      PACIFIC      AMERICA**



Figure S8

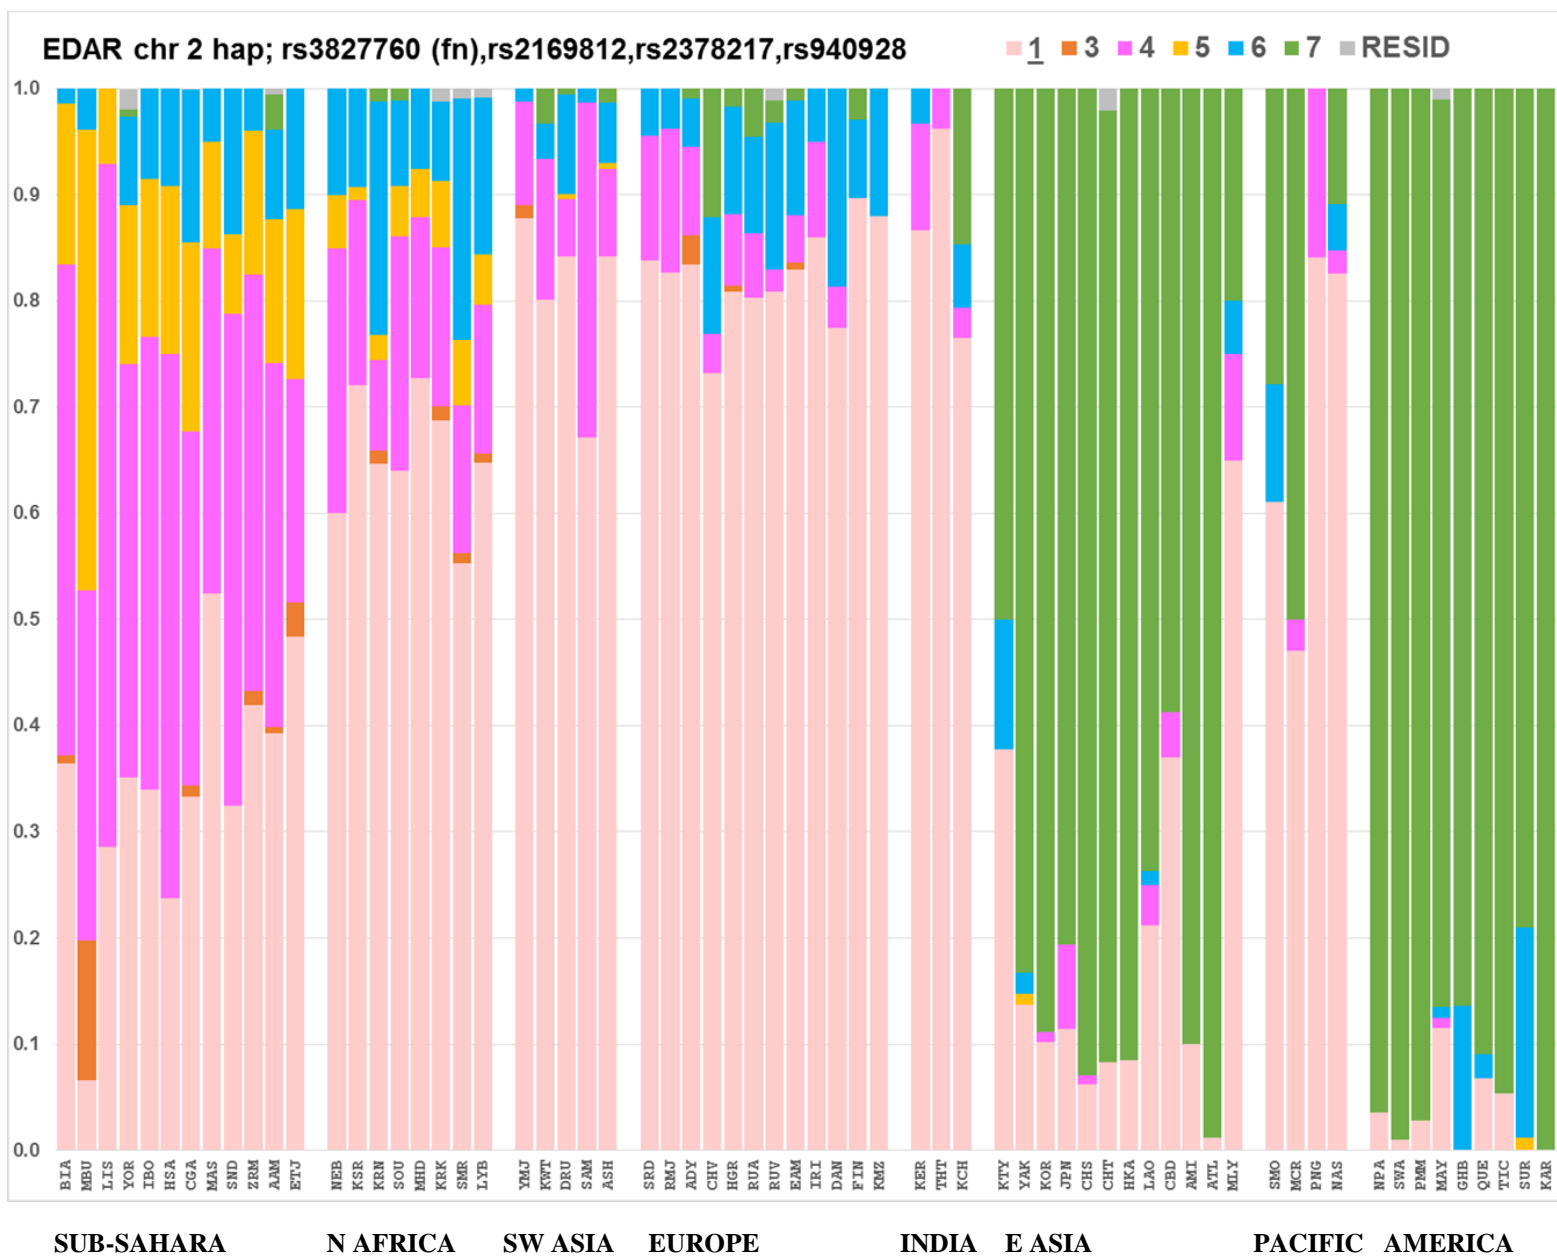

Figure S9

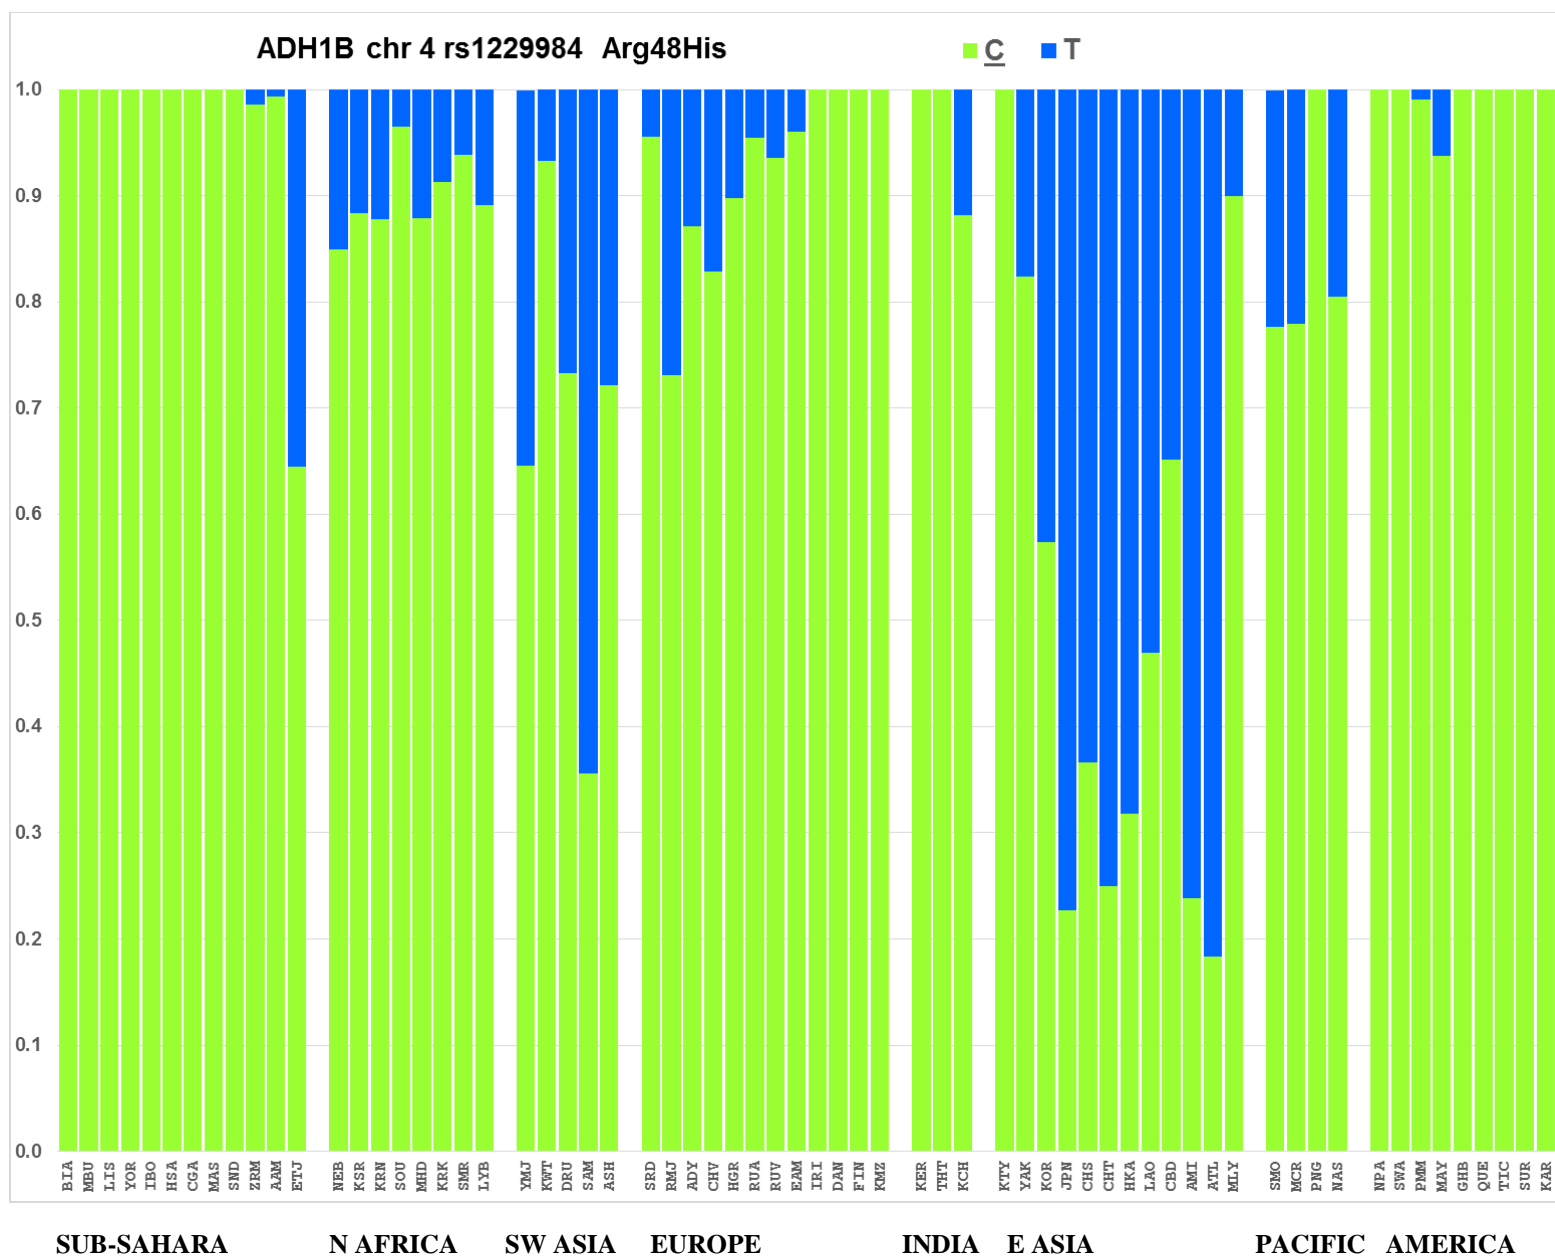

Figure S10

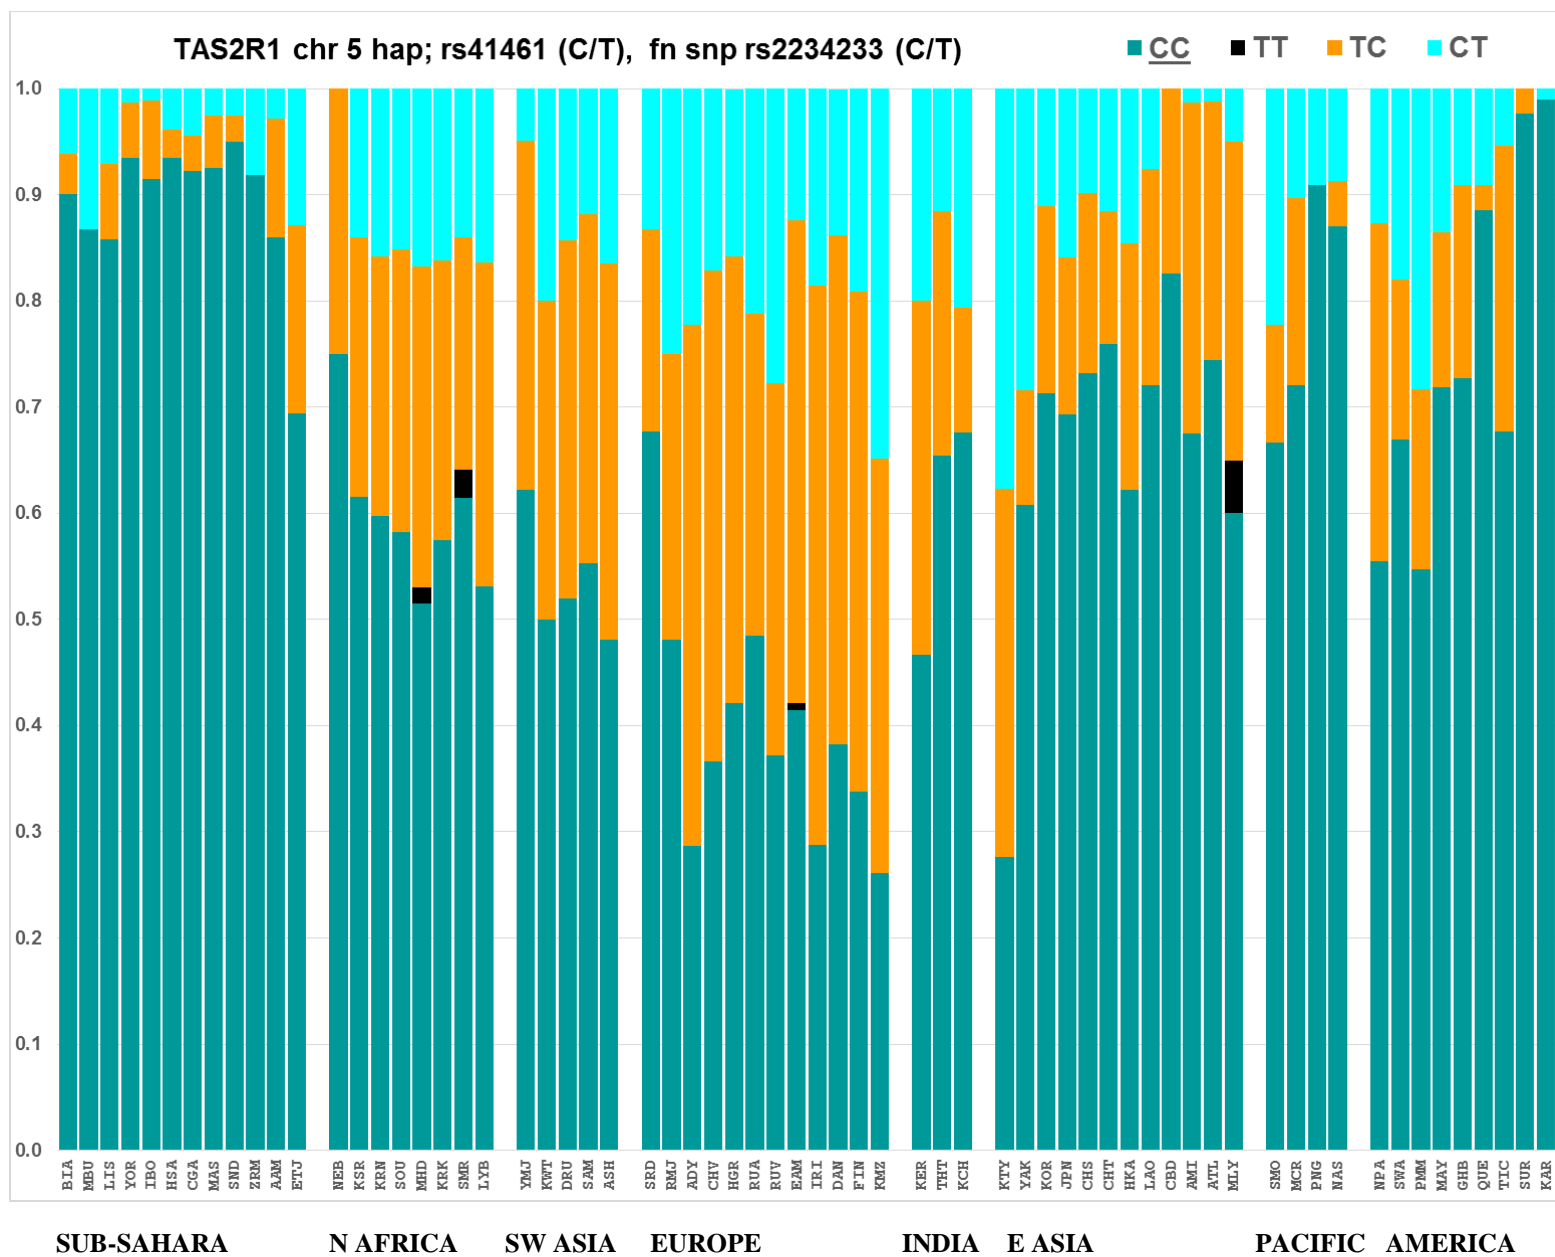

Figure S11

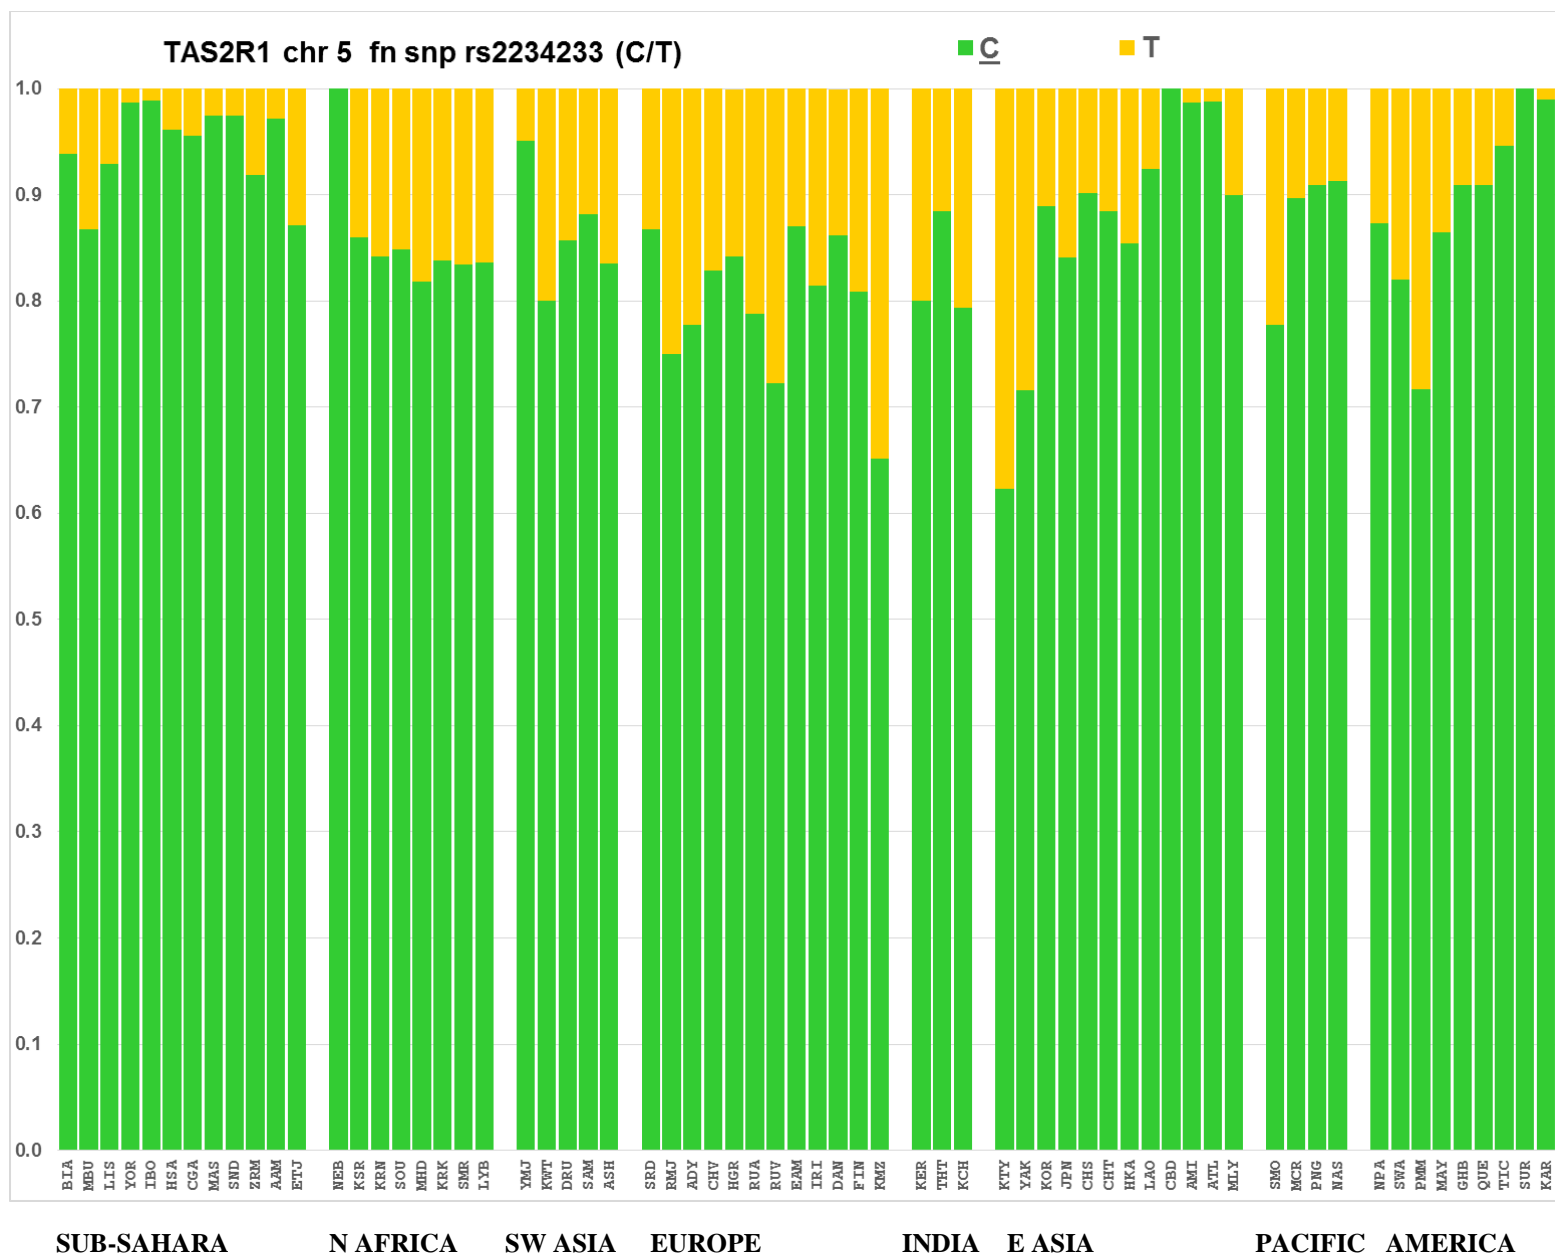

Figure S12

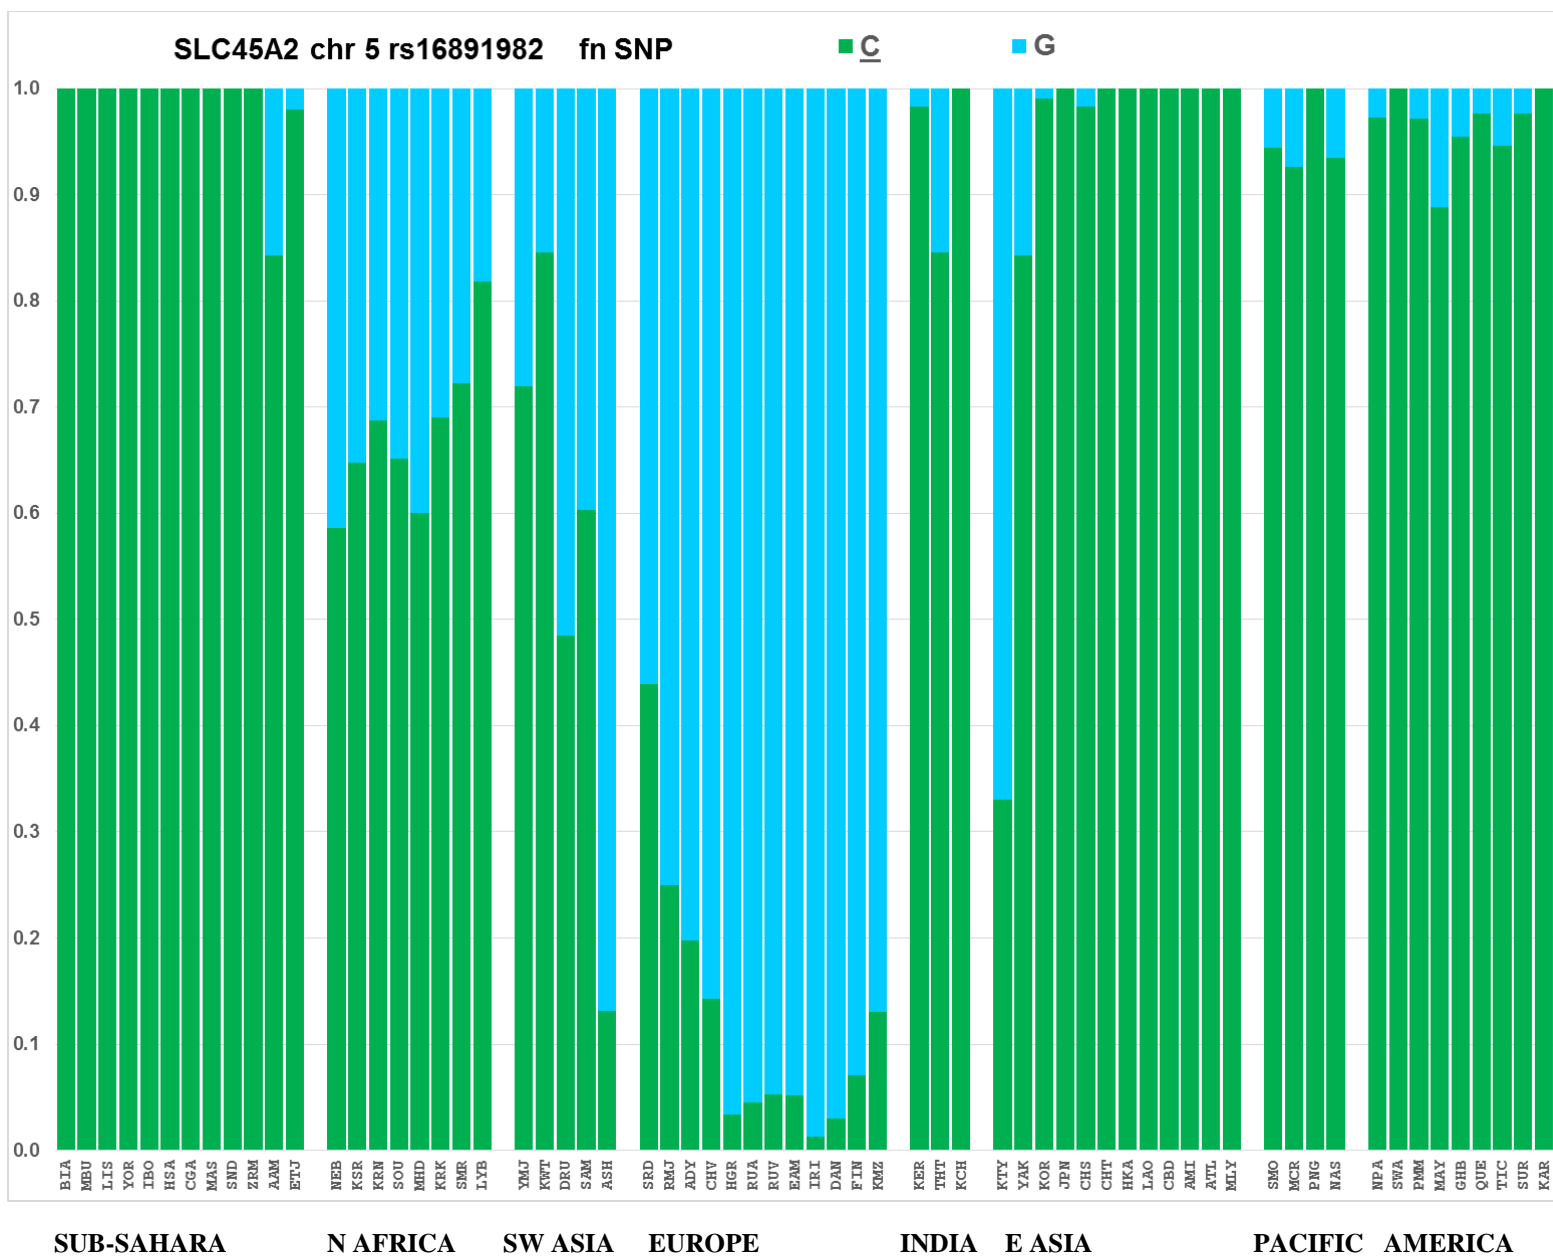

Figure S13

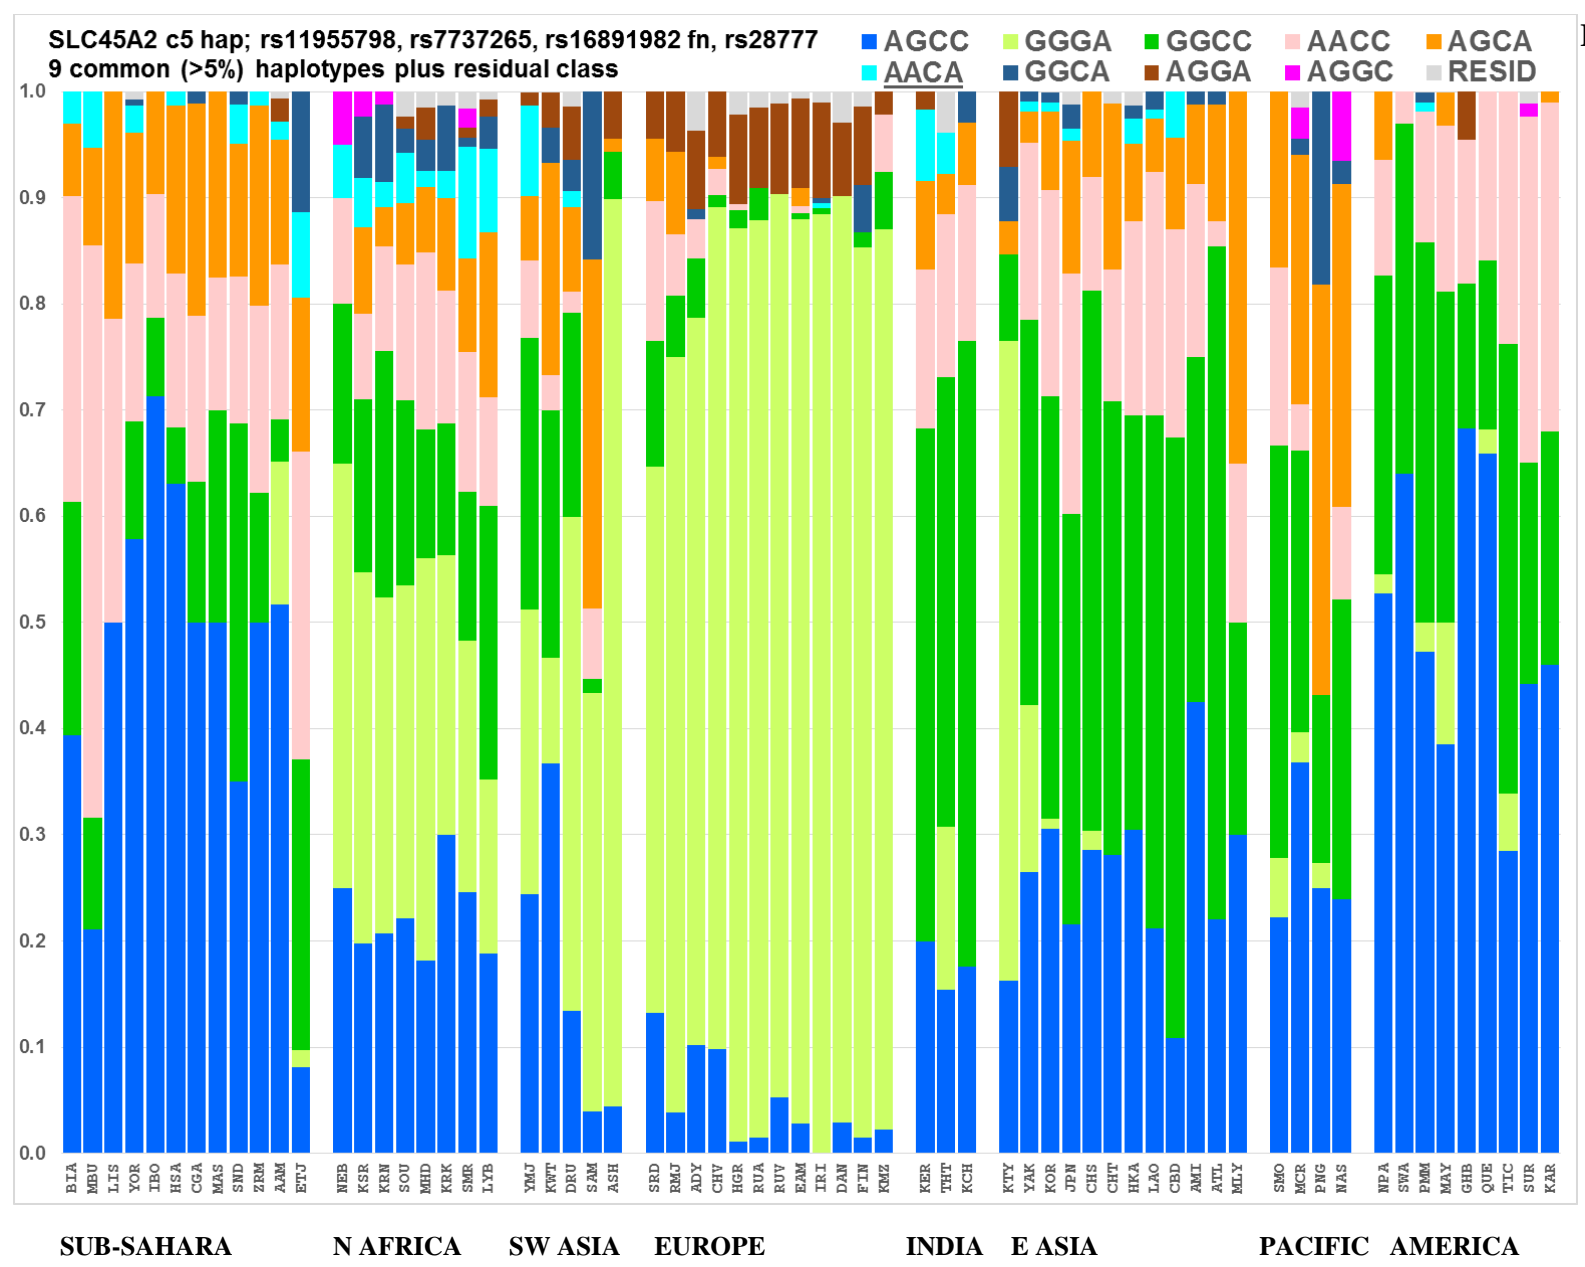

Figure S14

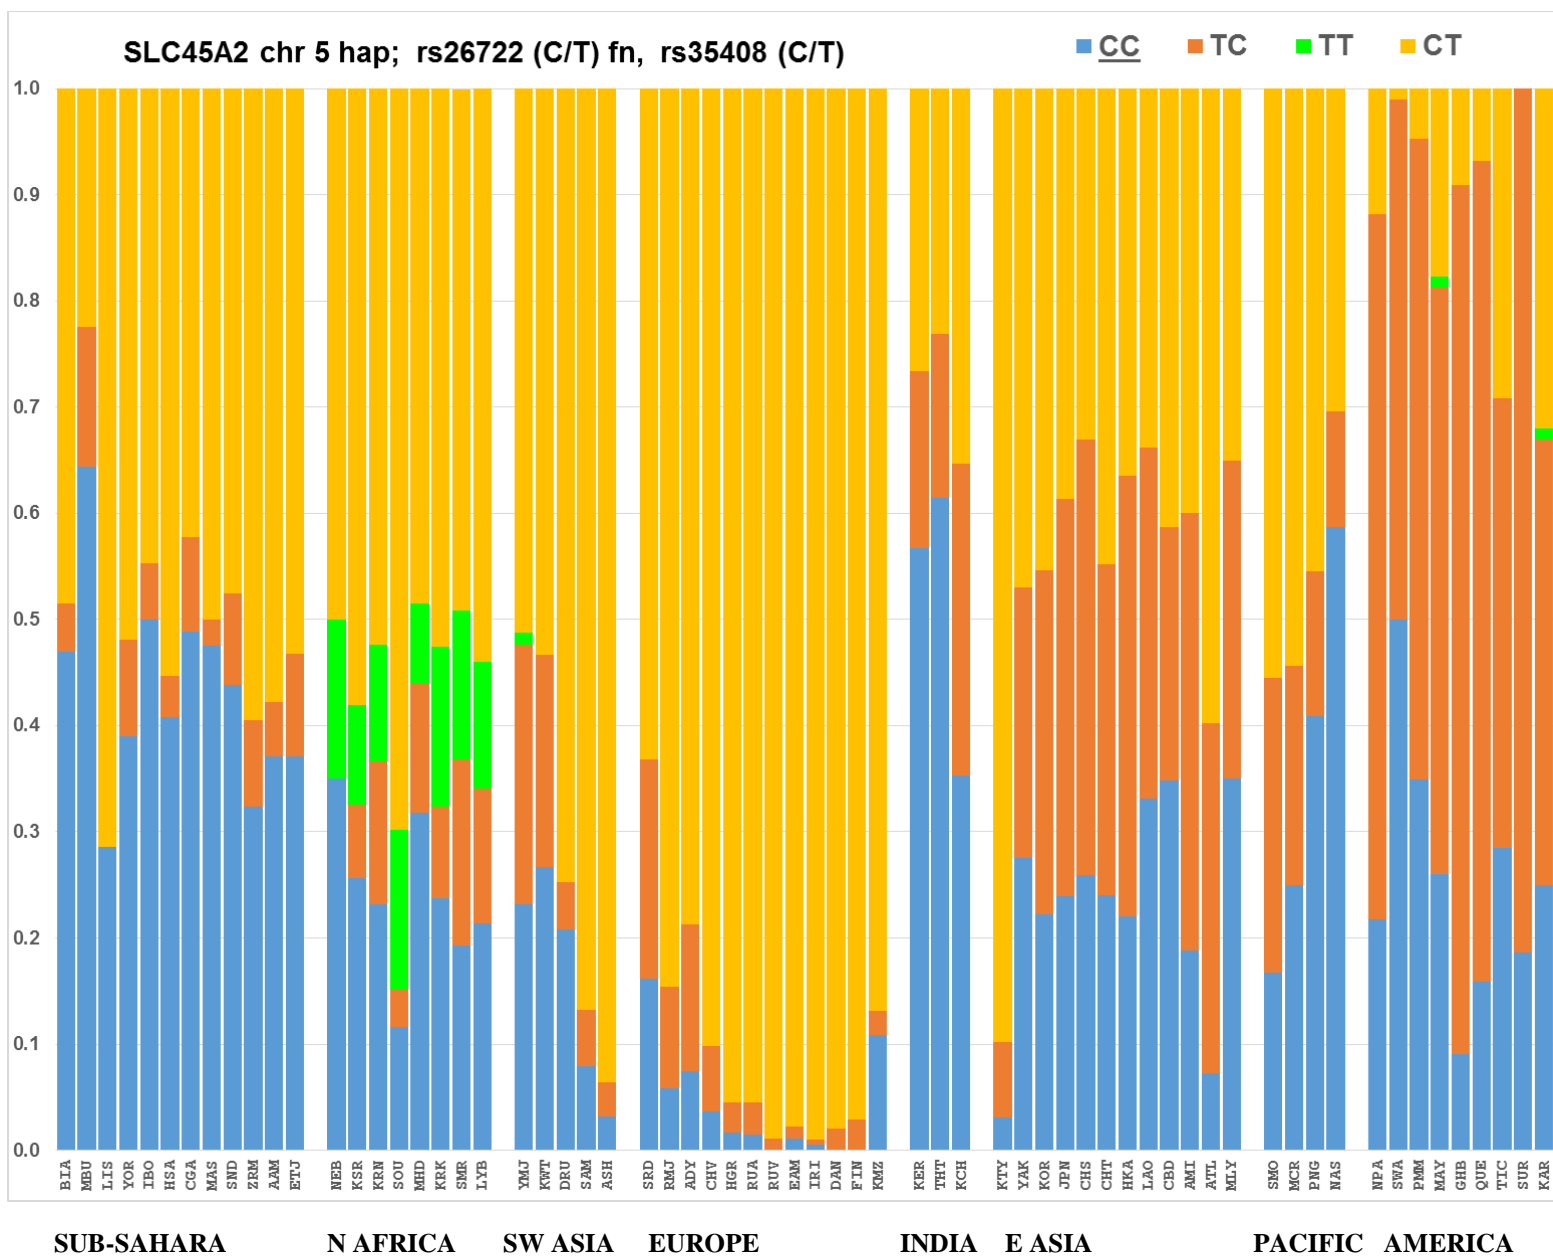

Figure S15

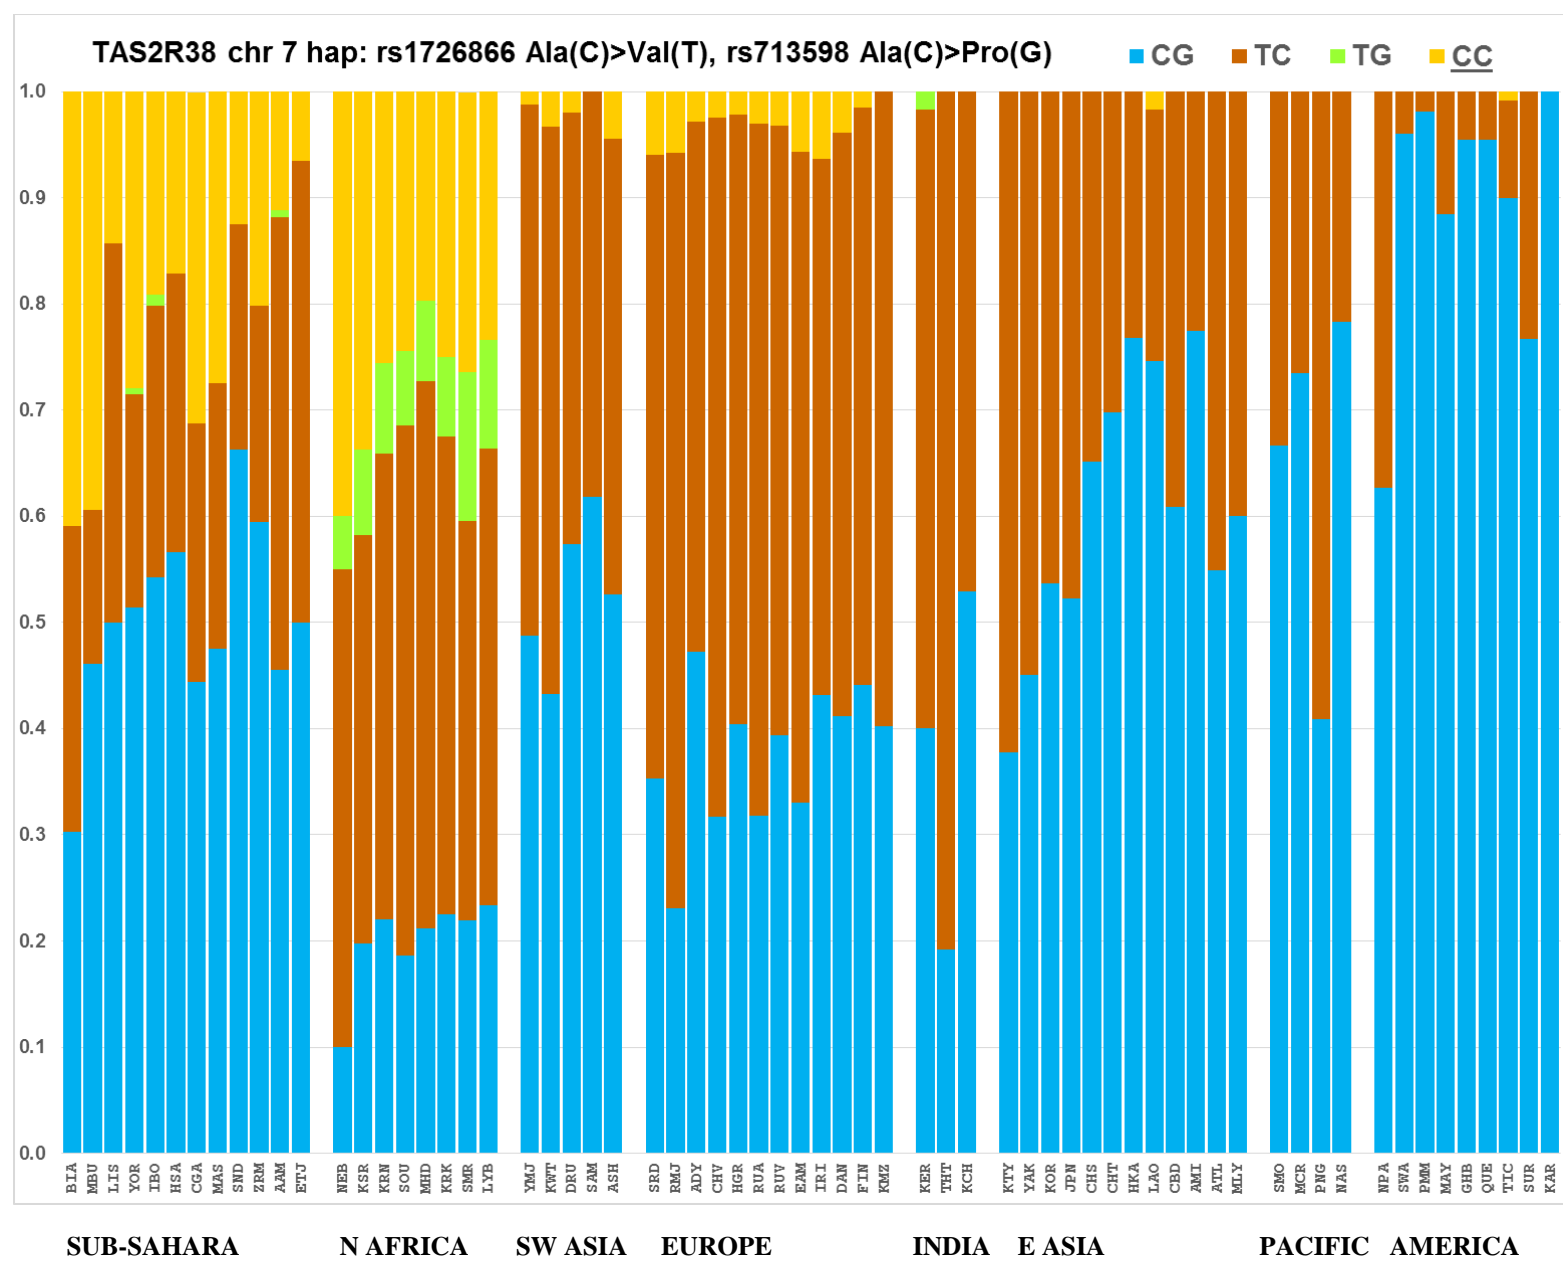



HERC2 chr 15 rs12913832

Figure S16

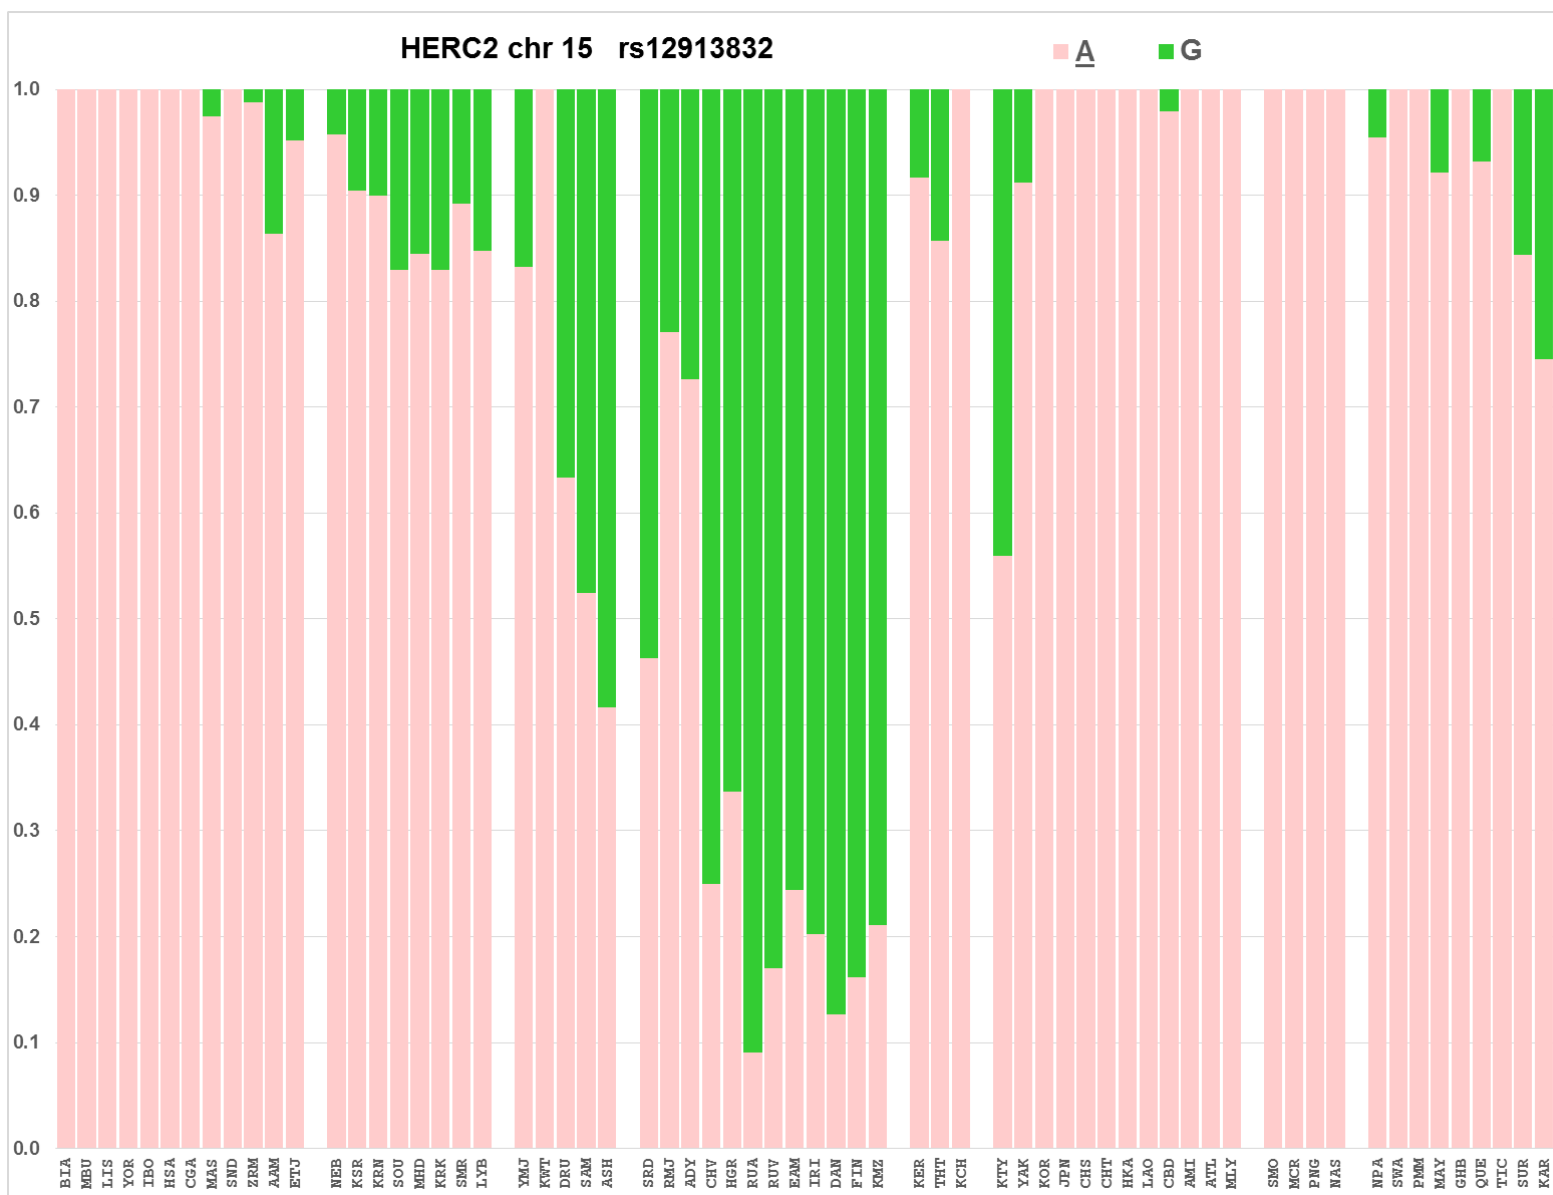

SUB-SAHARA

N AFRICA

SW ASIA

EUROPE

INDIA

E ASIA

PACIFIC

AMERICA

Figure S17

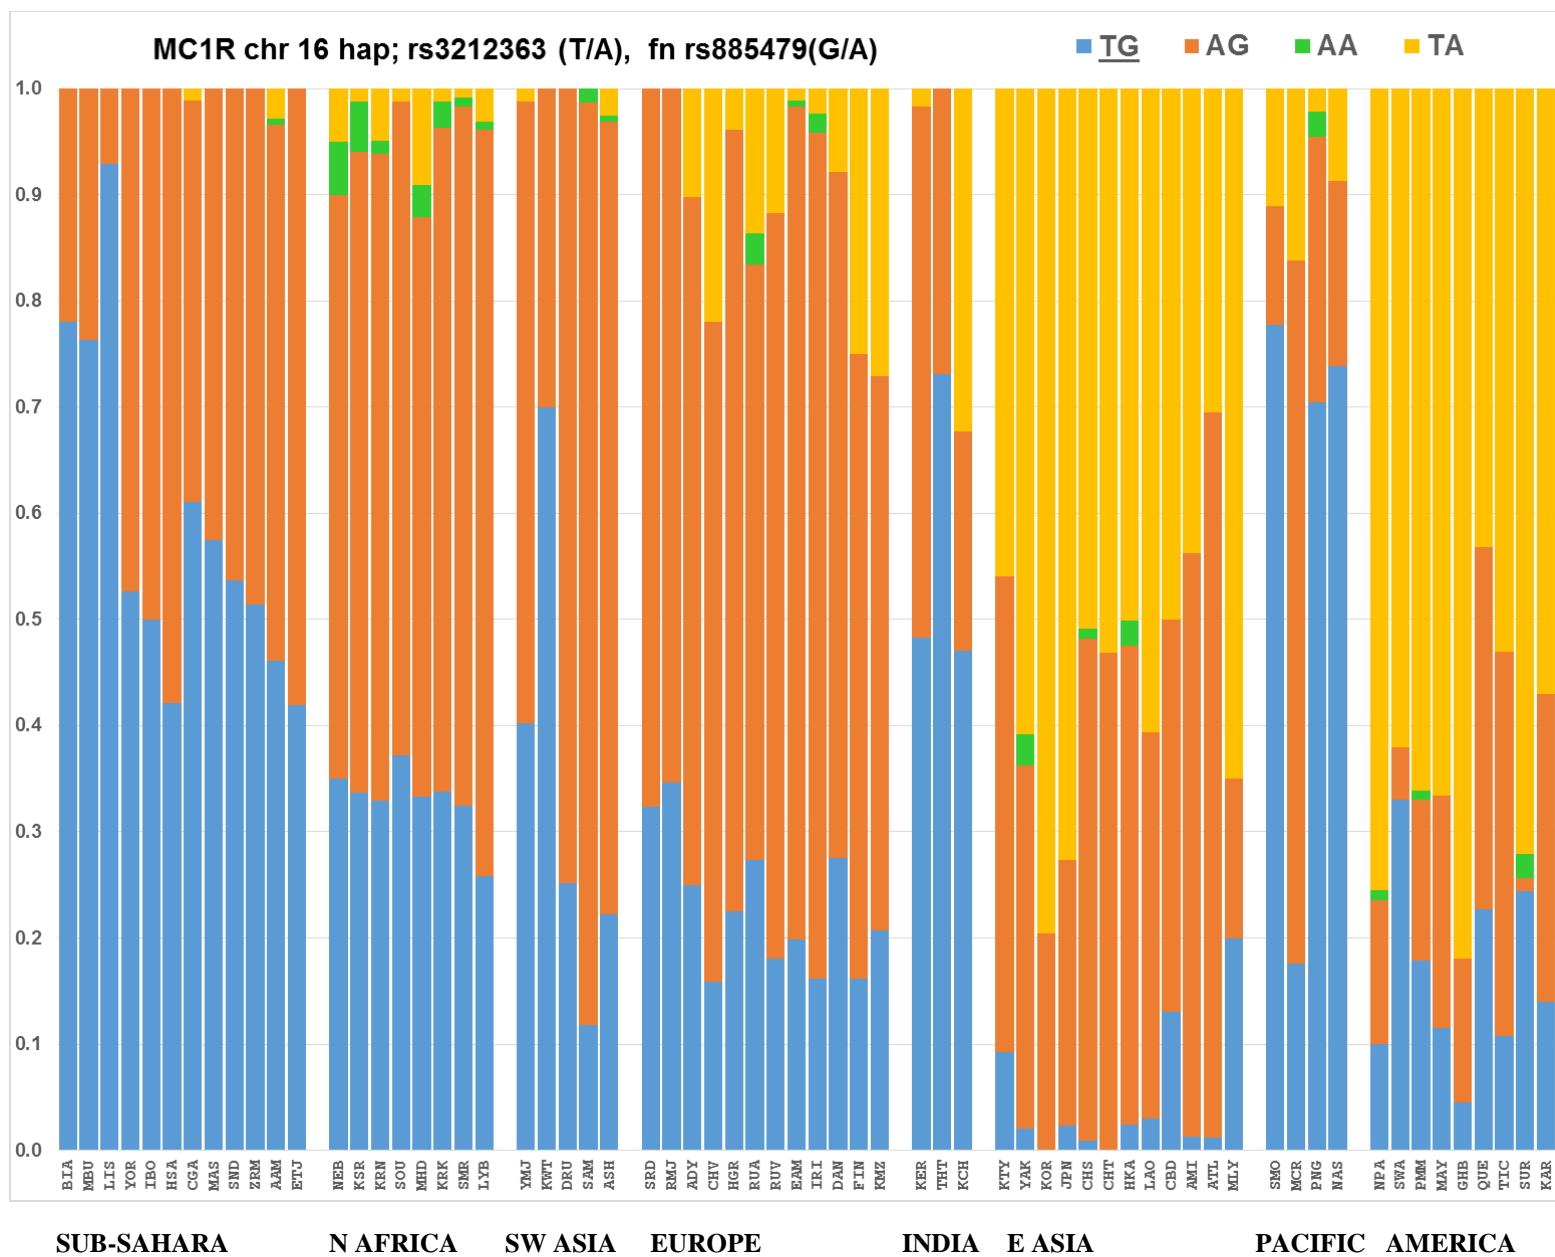

**Fig. S18**

**PCA: 8 N. African populations; 299 genetic systems (240 single SNPs, 59 haplotypes)**

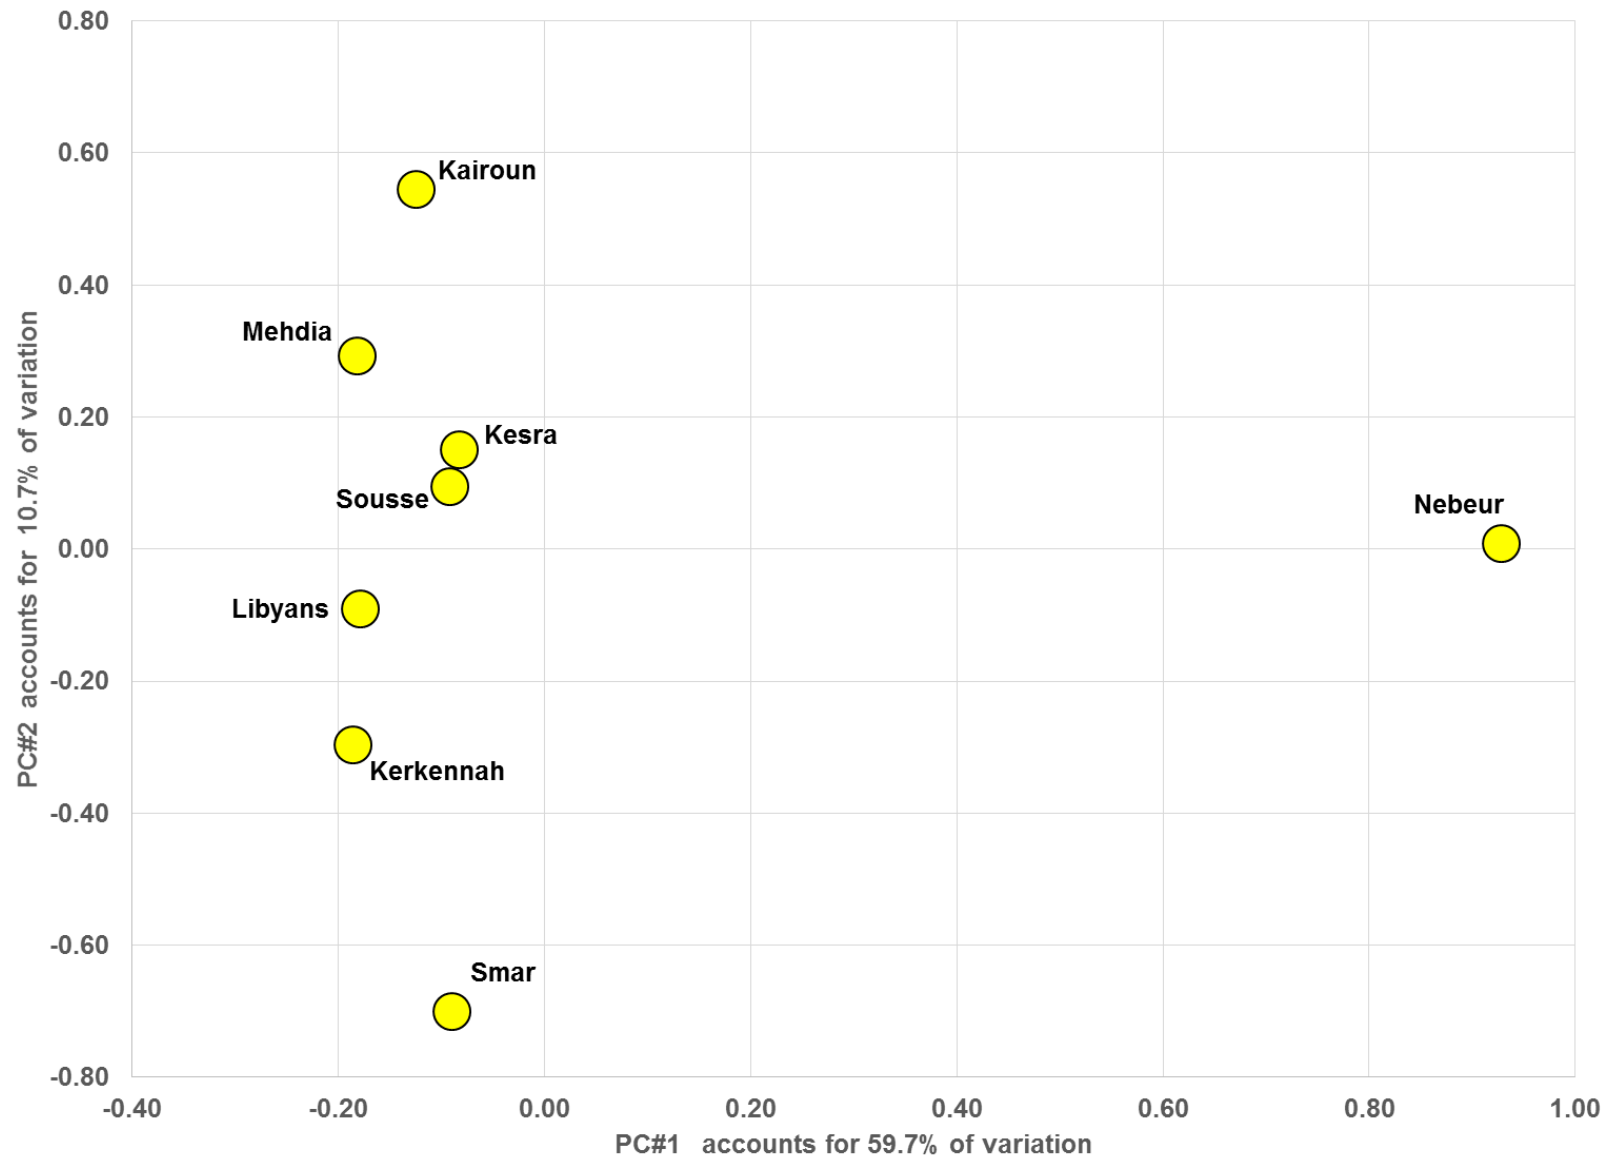

**Fig. S19**

**PCA: 8 N. African populations; 299 genetic systems (240 single SNPs, 59 haplotypes)**

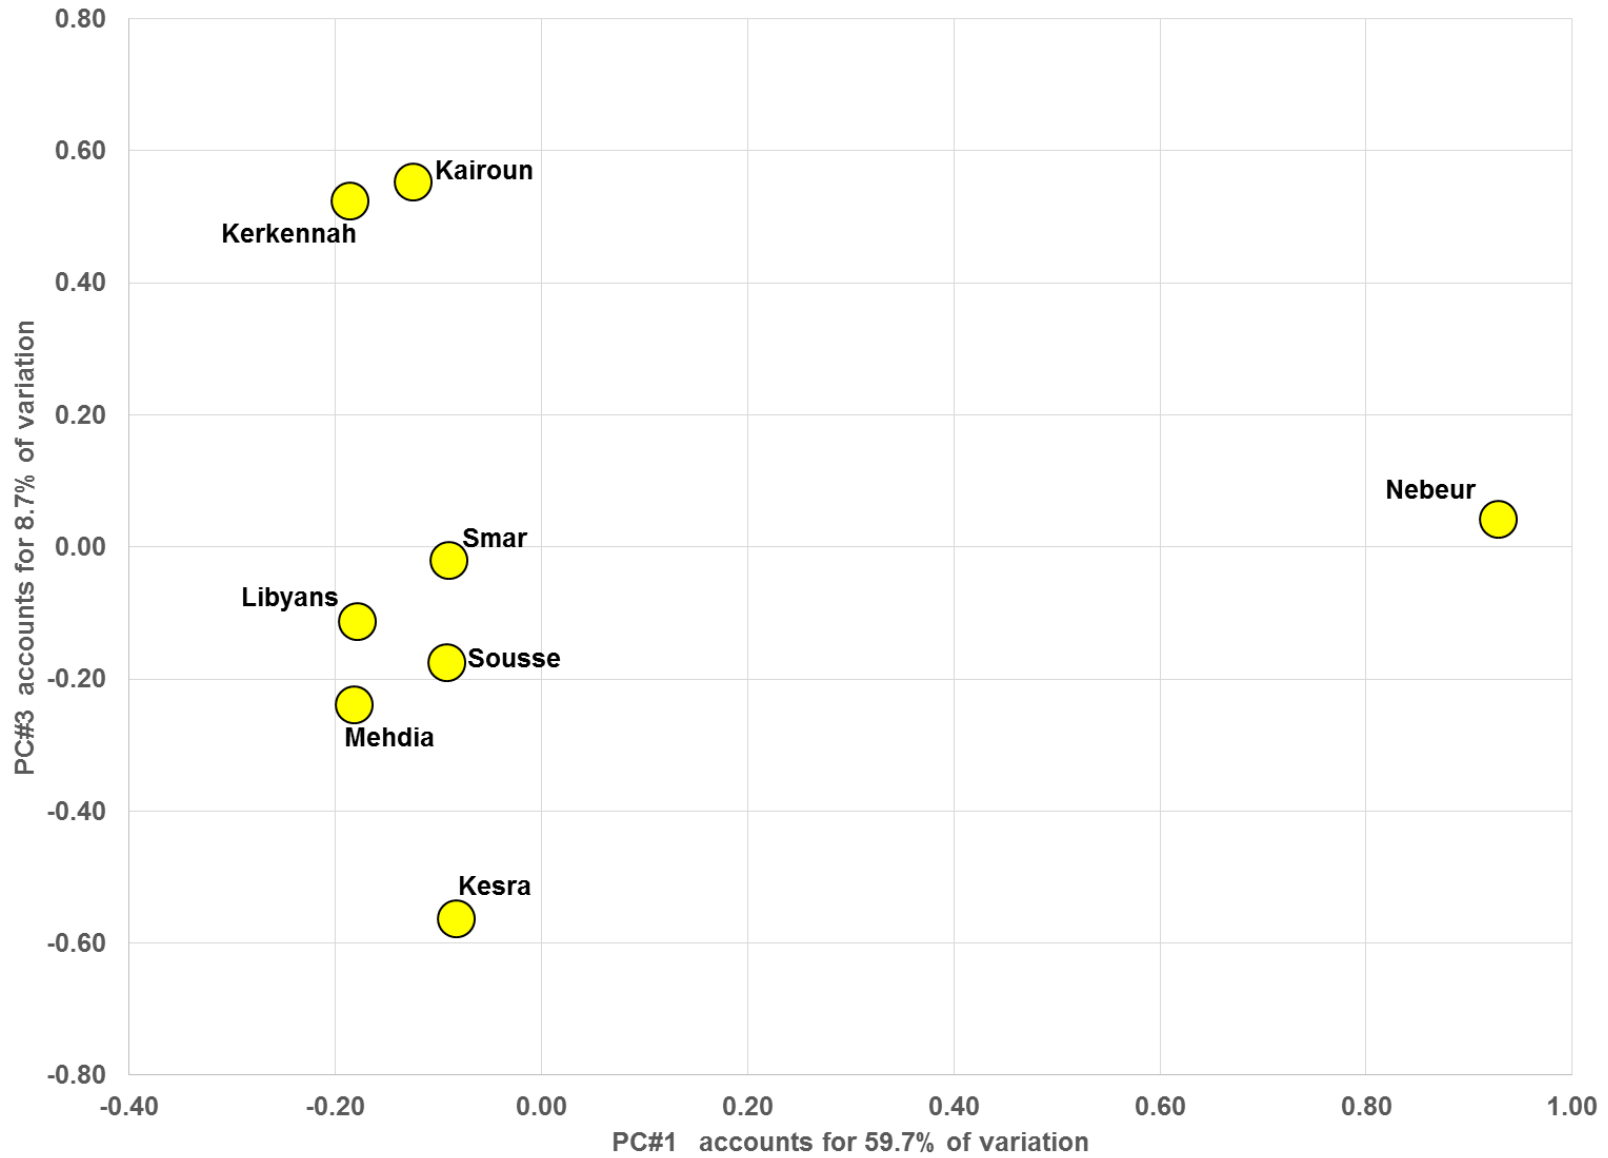

**Fig. S20**

**PCA: 8 N. African populations; 299 genetic systems (240 single SNPs, 59 haplotypes)**

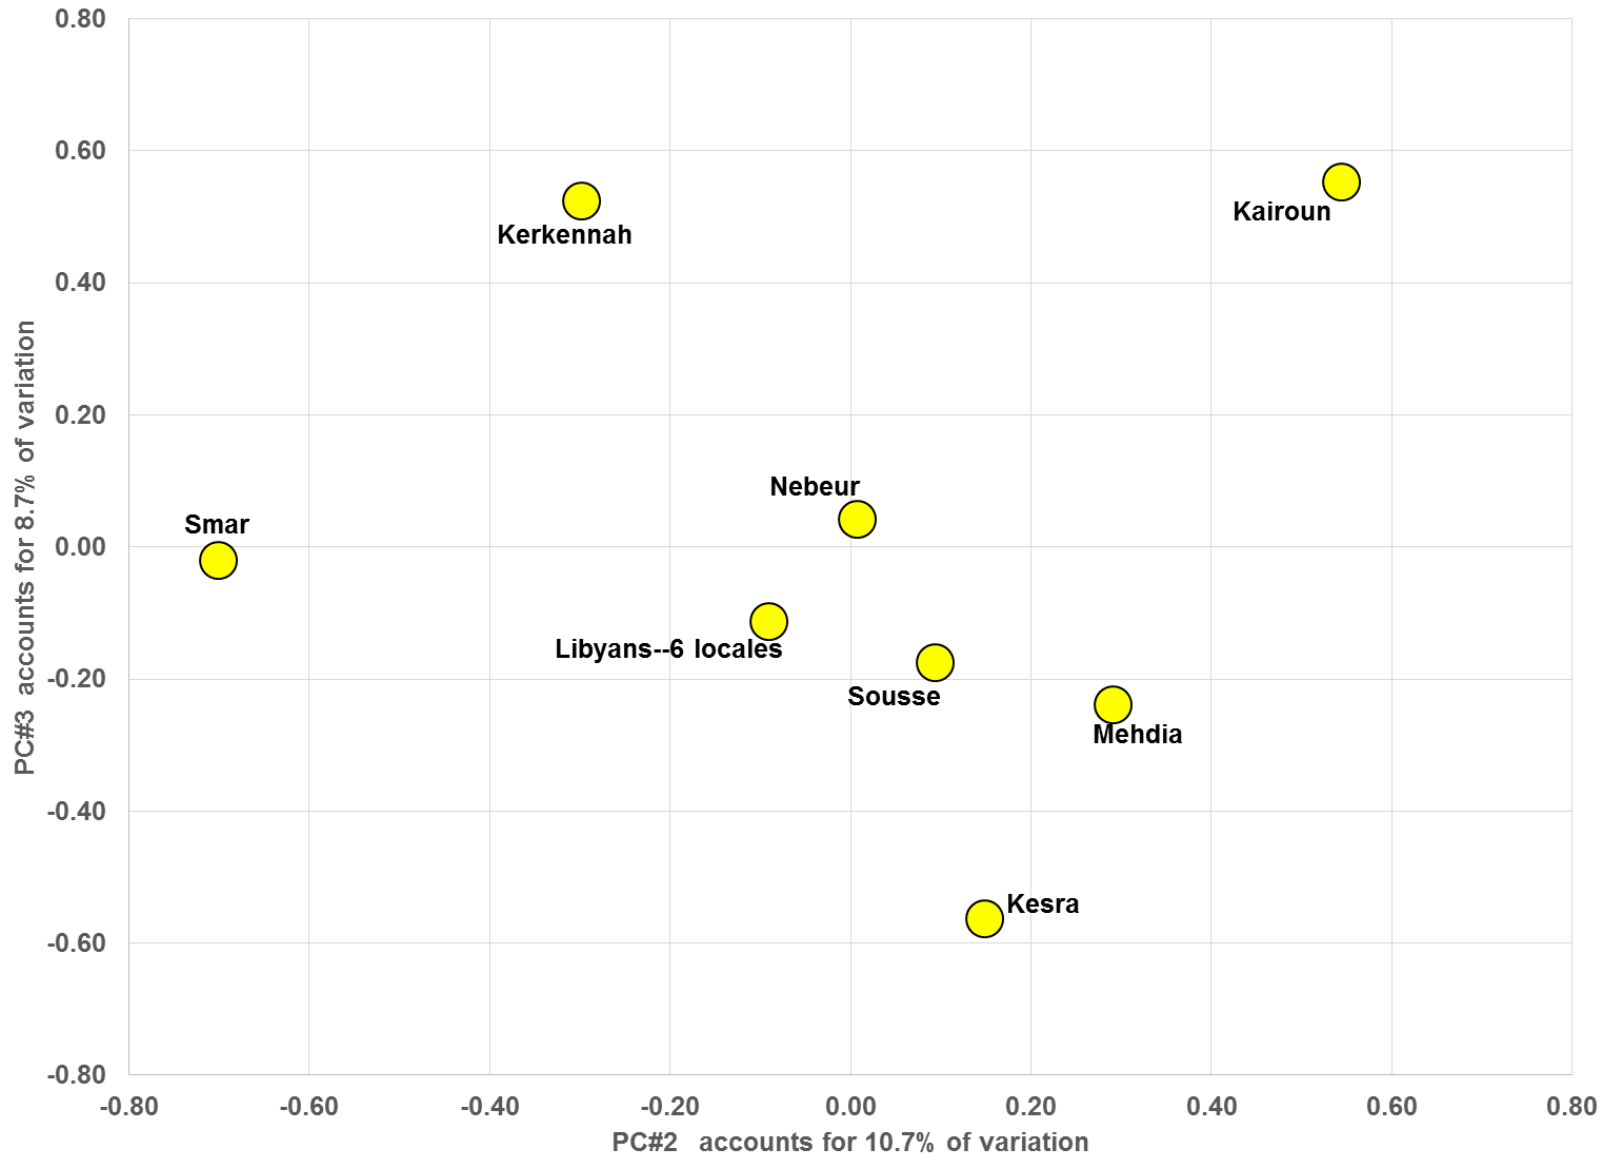

**Fig. S21** PCA: N Afr & SW Asia--12 populations; 299 genetic systems (240 SNPs, 59 haplotypes)

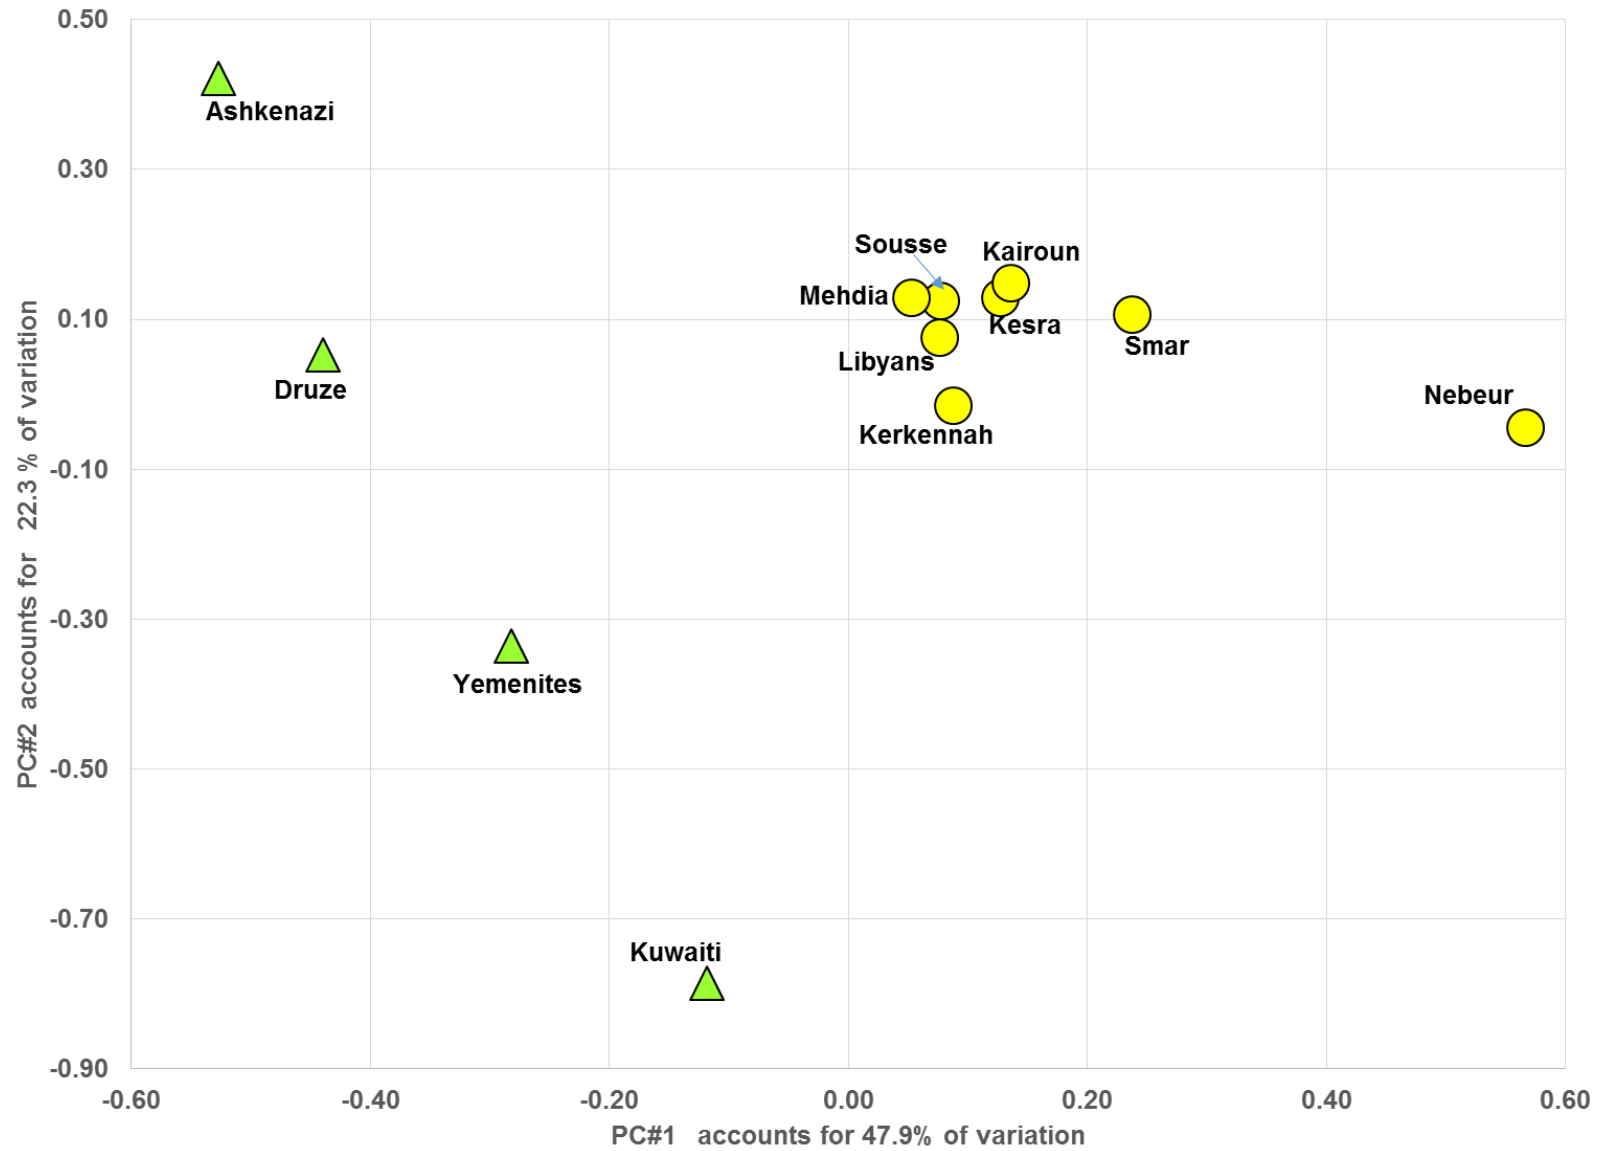

**Fig. S22**

**PCA: 15 North African populations; 90 markers (81 single SNPs, 9 haplotypes)**

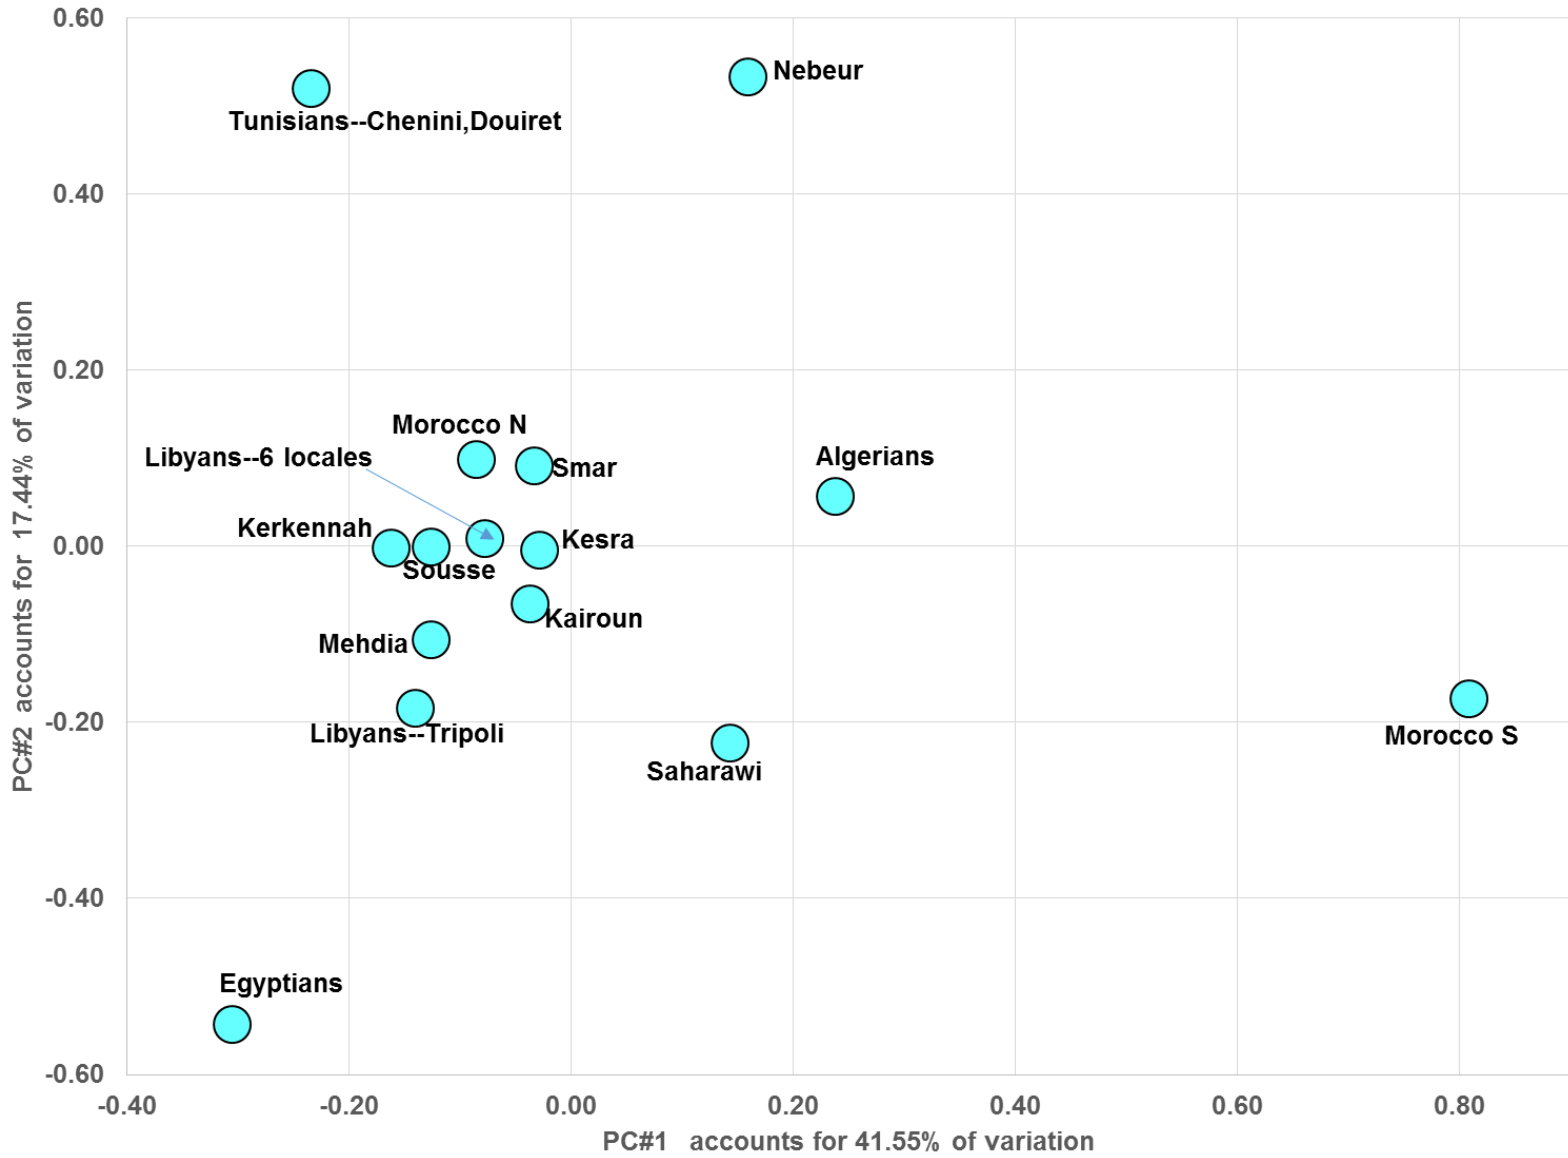

**Fig. S23**

**PCA: N Afr, SW Asia--19 populations; 90 markers (81 single SNPs, 9 haplotypes)**

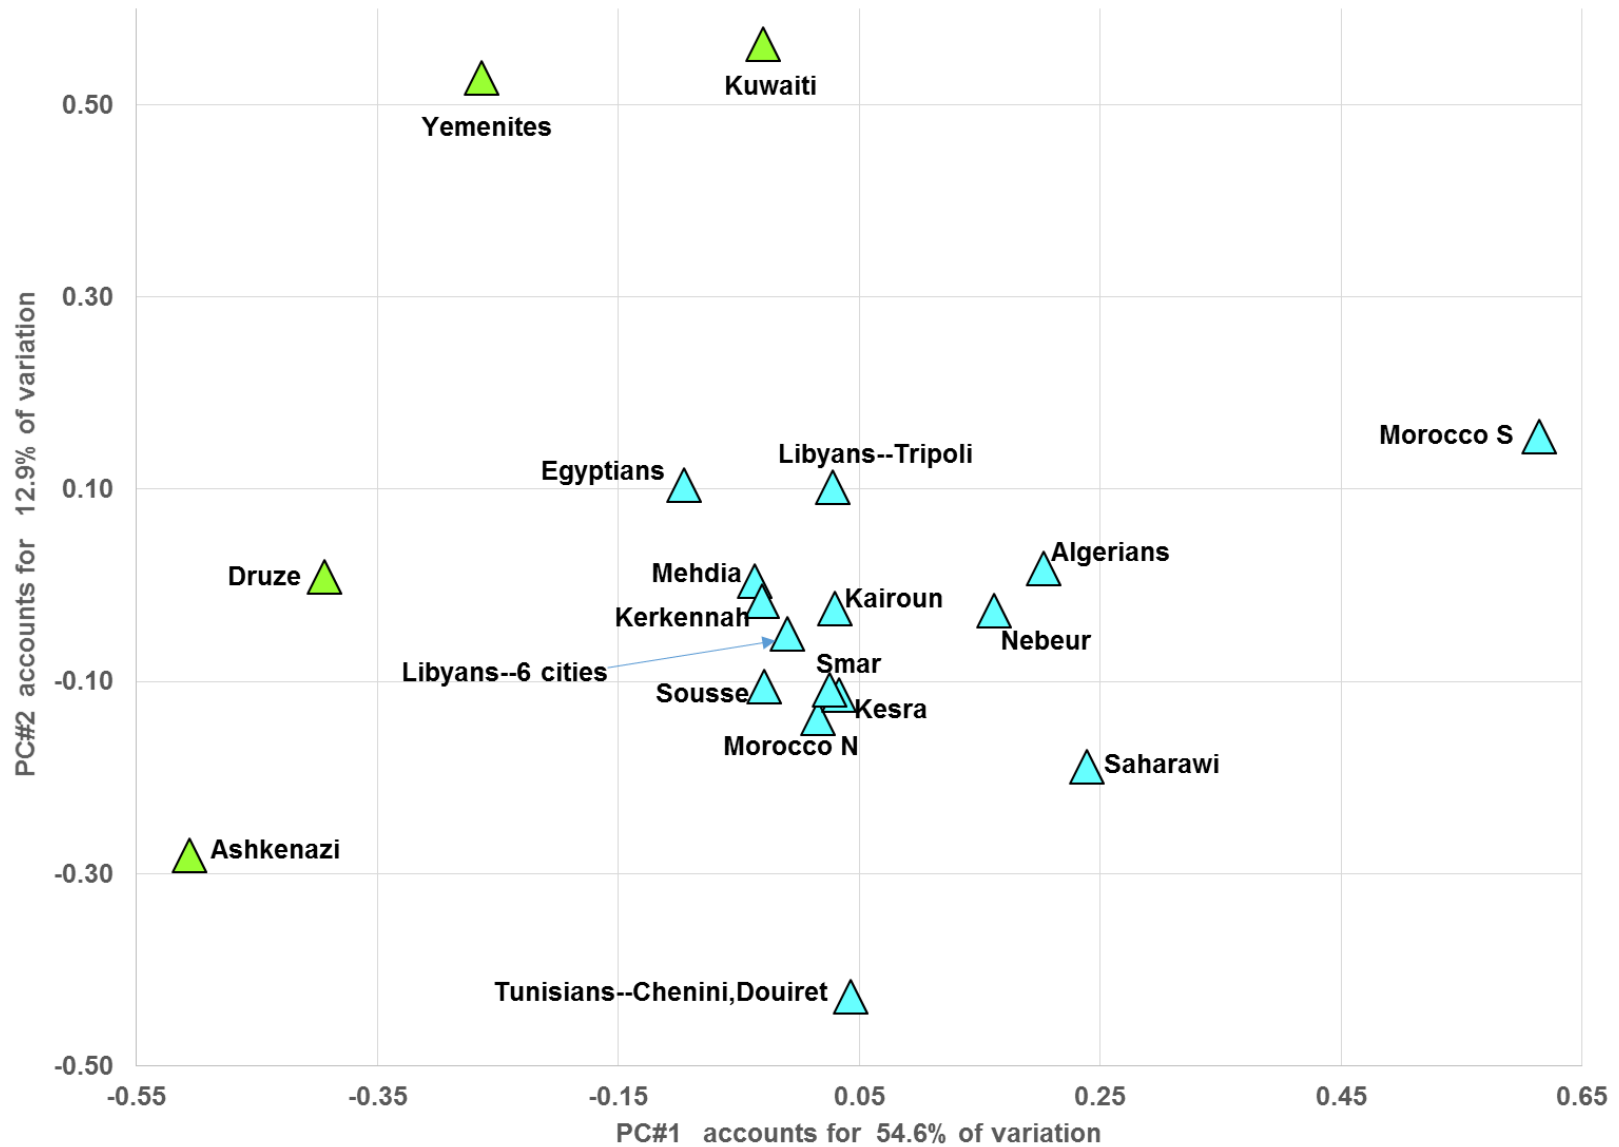

Supplement: AJPA-161-62-s001.pdf [file AJPA-161-62-s001.pdf]
